# Supplementary material
Source: publisher figshare collection journal article supplement (https://acs.figshare.com/ndownloader/files/5709606)
Supplement: Supplementary file 1 [file 5709606]

# ic9714753.cif

data_global

_publ_requested_journal            'INORGANIC CHEMISTRY'              
_publ_contact_letter                                             
;
Please consider this CIF submission as crystallographic information file
for manuscript  IC9714753 (Inorganic Chemistry).
;             
 
_publ_contact_author                                                   
;    Prof. Lluis Escriche
     Departament de Qu\`imica
     Universitat Aut\'onoma de Barcelona
     08193 Bellaterra
     Barcelona
     Spain
;
                                                  
_publ_contact_author_phone          '34 3 5811606'                   
_publ_contact_author_fax            '34 3 5813101'                    
_publ_contact_author_email          'iqicasabo@cc.uab.es'

loop_
_publ_author_name
_publ_author_address                                                   
 
     'Mu\~noz, J. A.'
;
     Departament de Qu\`imica 
     Universitat Aut\'onoma de Barcelona
     08193 Bellaterra
     Barcelona
     Spain
;    
     'Escriche, L.'  
;
     Departament de Qu\`imica 
     Universitat Aut\'onoma de Barcelona
     08193 Bellaterra
     Barcelona
     Spain
;
     'Casab\'o, J.'
;
     Departament de Qu\`imica 
     Universitat Aut\'onoma de Barcelona
     08193 Bellaterra
     Barcelona
     Spain
;
     'Kivek\"as, R.'
;
     Department of Chemistry
     P.O.Box 55
     FIN-00014 University of Helsinki
     Finland
;
     'Sillanp\"a\"a, R.'
;
     Department of Chemistry
     University of Turku
     FIN-20014 Turku      
     Finland
;


#================================================================
 
 #      (IUCr Office Use Only)
 
_journal_date_recd_electronic     ?
_journal_date_to_coeditor         ?
_journal_date_from_coeditor       ?
_journal_date_accepted            ?
_journal_date_printers_first      ?
_journal_date_printers_final      ?
_journal_date_proofs_out          ?
_journal_date_proofs_in           ?
_journal_coeditor_name            ?
_journal_coeditor_code            ?
_journal_coeditor_notes           ?

_journal_techeditor_code          ?
_journal_techeditor_notes         ?

_journal_coden_ASTM               ?
_journal_name_full                ?
_journal_year                     ?
_journal_volume                   ?
_journal_issue                    ?
_journal_page_first               ?
_journal_page_last                ?
_journal_suppl_publ_number        ?
_journal_suppl_publ_pages         ?
 


data_compound_1_for_IC9714753
 
_audit_creation_date               97-00-12
_audit_creation_method             from_xtal_archive_file_using_CIFIO
_audit_update_record               ?
 
_chemical_compound_source          'synthesis'                           #ActaC
_chemical_name_systematic          ?                                     #ActaC
_chemical_name_common              ?                                     #ActaC
_chemical_formula_analytical       ?                                     #ActaC
_chemical_formula_moiety           'C21 H26 N3 Ni P S2, 2(Cl O4)'        #ActaC
_chemical_formula_structural       'C21 H26 N3 Ni P S2, (Cl O4)2'        #ActaC
_chemical_formula_sum              'C21 H26 Cl2 N3 Ni O8 P S2'       #ActaC
_chemical_formula_weight           673.15                                #ActaC
_chemical_melting_point            'not measured'                        #ActaC
 
_computing_data_collection         
;
MSC/AFC Diffractometer Control Software (Molecular Structure Corporation, 
1993)
;
_computing_cell_refinement        
;
MSC/AFC Diffractometer Control Software (Molecular Structure Corporation, 
1993)
;
_computing_data_reduction 
;
Texsan Process (Molecular Structure Corporation ,1993)
;
_computing_structure_solution      'SHELXS86 (Sheldrick, 1985)'
_computing_structure_refinement    'xtal_CRYLSQ (Hall, Flack & Stewart, 1992)'
_computing_molecular_graphics      xtal_ORTEP                           #ActaC
_computing_publication_material    xtal_BONDLA_CIFIO                     #ActaC
 
_cell_length_a                     12.704(2)                             #ActaC
_cell_length_b                     13.538(2)                             #ActaC
_cell_length_c                     17.377(2)                             #ActaC
_cell_angle_alpha                  90.00000                              #ActaC
_cell_angle_beta                   107.554(8)                            #ActaC
_cell_angle_gamma                  90.00000                              #ActaC
_cell_volume                       2849.4(7)                             #ActaC
_cell_formula_units_Z              4                                     #ActaC
_cell_measurement_temperature      294                                   #ActaC
_cell_measurement_reflns_used      25                                    #ActaC
_cell_measurement_theta_min        12.5                                  #ActaC
_cell_measurement_theta_max        16.8                                  #ActaC
_cell_special_details                                                    #ActaC
;
 ?
;
 
_symmetry_cell_setting             monoclinic                            #ActaC
_symmetry_space_group_name_H-M     'P 1 21/c 1'                          #ActaC
_symmetry_space_group_name_Hall    -P_2ybc                               #ActaC
loop_
_symmetry_equiv_pos_as_xyz                                               #ActaC
  +x,+y,+z  -x,1/2+y,1/2-z  -x,-y,-z  +x,1/2-y,1/2+z
 
_exptl_crystal_description         plate                                 #ActaC
_exptl_crystal_preparation         ?
_exptl_crystal_colour              violet                                #ActaC
_exptl_crystal_size_max            0.36                                 #ActaC
_exptl_crystal_size_mid            0.22                                  #ActaC
_exptl_crystal_size_min            0.10                                  #ActaC
_exptl_crystal_density_diffrn        1.569                               #ActaC
_exptl_crystal_density_meas        'not measured'                        #ActaC
_exptl_crystal_density_method      ?                                     #ActaC
_exptl_crystal_F_000               1383.79                               #ActaC
 
_exptl_absorpt_process_details     ?
_exptl_absorpt_coefficient_mu      1.12                                  #ActaC
_exptl_absorpt_correction_type     'empirical via \y scans'              #ActaC
_exptl_absorpt_correction_T_min    0.90                                  #ActaC
_exptl_absorpt_correction_T_max    1.00                                 #ActaC
_exptl_special_details                                                   #ActaC
;
 ?
;
 
_diffrn_special_details
;
 ?
;
_diffrn_ambient_temperature        294                                  #ActaC
_diffrn_radiation_wavelength       0.71069                              #ActaC
_diffrn_radiation_type             MoK\a                                #ActaC
_diffrn_radiation_source           'fine-focus sealed tube'             #ActaC
 
_diffrn_radiation_monochromator    graphite                             #ActaC
_diffrn_radiation_detector         ?                                    #ActaC
_diffrn_measurement_device         'Rigaku AFC5S'                       #ActaC
_diffrn_measurement_method         '\w--2\q'                            #ActaC
 
_diffrn_standards_number           3                                    #ActaC
_diffrn_standards_interval_count   150                                  #ActaC
_diffrn_standards_interval_time    ?                                    #ActaC
_diffrn_standards_decay_%          0.5                                  #ActaC
 
loop_
_diffrn_standard_refln_index_h                                          #ActaC
_diffrn_standard_refln_index_k                                          #ActaC
_diffrn_standard_refln_index_l                                          #ActaC
  ?  ?  ?
 
loop_
_diffrn_attenuator_code
_diffrn_attenuator_scale
  ?  ?
 
_diffrn_reflns_number              5503                                 #ActaC
_diffrn_reflns_av_R_equivalents    0.027                                #ActaC
_diffrn_reflns_av_sigmaI/netI      0.072                                #ActaC
_diffrn_reflns_limit_h_min         0                                    #ActaC
_diffrn_reflns_limit_h_max         15                                   #ActaC
_diffrn_reflns_limit_k_min         0                                    #ActaC
_diffrn_reflns_limit_k_max         16                                   #ActaC
_diffrn_reflns_limit_l_min         -21                                  #ActaC
_diffrn_reflns_limit_l_max         21                                   #ActaC
_diffrn_reflns_theta_min              1.68                              #ActaC
_diffrn_reflns_theta_max             24.99                              #ActaC
_diffrn_reflns_reduction_process   ?                                    #ActaC
 
loop_
_atom_type_symbol                                                       #ActaC
_atom_type_description                                                  #ActaC
_atom_type_oxidation_number
_atom_type_number_in_cell
_atom_type_scat_dispersion_real                                         #ActaC
_atom_type_scat_dispersion_imag                                         #ActaC
_atom_type_scat_source                                                  #ActaC
 'Ni'  'Ni'  0  4  .284973   1.113  Int._Tables_Vol_IV_Tables_2.2B_and_2.3.1
 'Cl'  'Cl'  0  8  .132019  .158997  Int._Tables_Vol_IV_Tables_2.2B_and_2.3.1
 'S'  'S'  0  8  .109985  .124023  Int._Tables_Vol_IV_Tables_2.2B_and_2.3.1
 'P'  'P'  0  4  .090027  .094971  Int._Tables_Vol_IV_Tables_2.2B_and_2.3.1
 'O'  'O'  0  32  .007996  .005981  Int._Tables_Vol_IV_Tables_2.2B_and_2.3.1
 'N'  'N'  0  12  .004028  .002991  Int._Tables_Vol_IV_Tables_2.2B_and_2.3.1
 'C'  'N'  0  84  .002014  .002014  Int._Tables_Vol_IV_Tables_2.2B_and_2.3.1
 'H'  'H'  0  104  0  0  Int._Tables_Vol_IV_Tables_2.2B_and_2.3.1
 
loop_
_atom_site_label                                                        #ActaC
_atom_site_fract_x                                                      #ActaC
_atom_site_fract_y                                                      #ActaC
_atom_site_fract_z                                                      #ActaC
_atom_site_U_iso_or_equiv                                               #ActaC
_atom_site_thermal_displace_type                                        #ActaC
_atom_site_occupancy
_atom_site_calc_flag                                                    #ActaC
_atom_site_calc_attached_atom                                           #ActaC
  Ni1  .71955(8)  .71425(7)  .43430(6)  .0385(5)  Uani  1  ?  ?
  Cl1  .3941(2)  .7197(2)  .1358(2)  .092(2)  Uani  1  ?  ?
  Cl2  .9447(2)  1.0284(2)  .2031(2)  .069(1)  Uani  1  ?  ?
  S1  .7347(2)  .7354(2)  .2985(1)  .052(1)  Uani  1  ?  ?
  S2  .7312(2)  .7386(2)  .5758(1)  .048(1)  Uani  1  ?  ?
  P1  .6341(2)  .8694(2)  .4131(1)  .043(1)  Uani  1  ?  ?
  O1  .420(1)  .7980(7)  .0986(6)  .171(9)  Uani  1  ?  ?
  O2  .3826(8)  .6407(7)  .0847(5)  .136(7)  Uani  1  ?  ?
  O3  .2991(8)  .736(1)  .1560(8)  .22(1)  Uani  1  ?  ?
  O4  .4766(9)  .695(1)  .2094(8)  .23(1)  Uani  1  ?  ?
  O5  .9052(9)  1.1232(7)  .1871(8)  .20(1)  Uani  1  ?  ?
  O6A  1.050(1)  1.054(2)  .259(1)  .115(7)  Uiso  0.493(9)  ?  ?
  O7A  .957(2)  .986(2)  .1367(9)  .23(1)  Uiso  0.493(9)  ?  ?
  O8A  .880(1)  .983(2)  .240(1)  .18(1)  Uiso  0.493(9)  ?  ?
  O6B  .984(1)  .999(1)  .2820(6)  .161(8)  Uiso  0.507(9)  ?  ?
  O7B  1.030(1)  1.017(1)  .1653(9)  .121(6)  Uiso  0.507(9)  ?  ?
  O8B  .856(1)  .968(1)  .1602(8)  .129(6)  Uiso  0.507(9)  ?  ?
  N1  .8768(5)  .7764(4)  .4707(4)  .039(3)  Uani  1  ?  ?
  N2  .7973(5)  .5764(5)  .4495(4)  .051(4)  Uani  1  ?  ?
  N3  .5765(6)  .6373(5)  .4054(5)  .065(5)  Uani  1  ?  ?
  C1  .8805(7)  .7602(7)  .3303(5)  .062(6)  Uani  1  ?  ?
  C2  .9293(6)  .7975(6)  .4156(5)  .046(4)  Uani  1  ?  ?
  C3  1.0297(7)  .8461(7)  .4363(6)  .068(6)  Uani  1  ?  ?
  C4  1.0797(7)  .8692(7)  .5148(6)  .076(6)  Uani  1  ?  ?
  C5  1.0276(7)  .8445(7)  .5725(5)  .060(5)  Uani  1  ?  ?
  C6  .9274(6)  .7994(6)  .5485(4)  .042(4)  Uani  1  ?  ?
  C7  .8775(7)  .7658(7)  .6103(5)  .061(5)  Uani  1  ?  ?
  C8  .6716(8)  .8604(6)  .5768(5)  .059(5)  Uani  1  ?  ?
  C9  .6821(7)  .9309(6)  .5108(5)  .052(5)  Uani  1  ?  ?
  C10  .6950(7)  .9289(6)  .3430(5)  .050(5)  Uani  1  ?  ?
  C11  .6804(7)  .8586(6)  .2700(5)  .053(5)  Uani  1  ?  ?
  C12  .4837(6)  .8829(6)  .3737(5)  .051(5)  Uani  1  ?  ?
  C13  .4173(7)  .8281(8)  .4060(6)  .068(6)  Uani  1  ?  ?
  C14  .3045(8)  .8335(9)  .3750(7)  .090(8)  Uani  1  ?  ?
  C15  .2560(8)  .8908(9)  .3093(7)  .096(8)  Uani  1  ?  ?
  C16  .3208(8)  .9472(8)  .2775(6)  .084(7)  Uani  1  ?  ?
  C17  .4350(8)  .9454(7)  .3091(5)  .070(6)  Uani  1  ?  ?
  C18  .8301(7)  .5000(6)  .4547(5)  .055(5)  Uani  1  ?  ?
  C19  .8758(9)  .4023(8)  .4604(7)  .092(4)  Uiso  1  ?  ?
  H19A  .870(5)  .372(5)  .508(2)  .092(4)  Uiso  1  ?  ?
  H19B  .830(4)  .369(5)  .415(3)  .092(4)  Uiso  1  ?  ?
  H19C  .950(2)  .399(6)  .460(4)  .092(4)  Uiso  1  ?  ?
  C20  .4951(9)  .5998(9)  .3961(7)  .097(8)  Uani  1  ?  ?
  C21  .379(1)  .555(1)  .380(1)  .21(2)  Uani  1  ?  ?
  H1A  .91739  .70060  .32537  .07400  Uiso  1  ?  ?
  H1B  .89433  .80851  .29490  .07400  Uiso  1  ?  ?
  H3  1.06322  .86316  .39606  .08200  Uiso  1  ?  ?
  H4  1.14912  .90180  .53040  .09100  Uiso  1  ?  ?
  H5  1.06199  .85898  .62794  .07200  Uiso  1  ?  ?
  H7A  .91497  .70737  .63402  .07300  Uiso  1  ?  ?
  H7B  .88908  .81603  .65017  .07300  Uiso  1  ?  ?
  H8A  .59527  .85229  .57093  .07100  Uiso  1  ?  ?
  H8B  .70715  .89001  .62761  .07100  Uiso  1  ?  ?
  H9A  .63865  .98807  .51034  .06200  Uiso  1  ?  ?
  H9B  .75724  .94948  .52124  .06200  Uiso  1  ?  ?
  H10A  .65877  .98984  .32531  .06000  Uiso  1  ?  ?
  H10B  .77130  .94059  .36871  .06000  Uiso  1  ?  ?
  H11A  .60379  .85336  .24200  .06400  Uiso  1  ?  ?
  H11B  .71755  .88652  .23524  .06400  Uiso  1  ?  ?
  H13  .44948  .78573  .45050  .08200  Uiso  1  ?  ?
  H14  .25959  .79691  .39961  .10800  Uiso  1  ?  ?
  H15  .17808  .89113  .28618  .11500  Uiso  1  ?  ?
  H16  .28731  .98880  .23272  .10100  Uiso  1  ?  ?
  H17  .47941  .98628  .28697  .08400  Uiso  1  ?  ?
 
loop_
_atom_site_aniso_label                                                  #ActaC
_atom_site_aniso_U_11                                                   #ActaC
_atom_site_aniso_U_22                                                   #ActaC
_atom_site_aniso_U_33                                                   #ActaC
_atom_site_aniso_U_12                                                   #ActaC
_atom_site_aniso_U_13                                                   #ActaC
_atom_site_aniso_U_23                                                   #ActaC
  Ni1  .0408(6)  .0365(6)  .0379(6)  .0022(5)  .0114(4)  -.0017(5)
  Cl1  .066(2)  .095(2)  .108(2)  .002(2)  .017(2)  -.038(2)
  Cl2  .067(2)  .072(2)  .072(2)  -.012(1)  .027(1)  -.003(1)
  S1  .068(1)  .051(1)  .035(1)  .010(1)  .014(1)  -.007(1)
  S2  .060(1)  .050(1)  .041(1)  .001(1)  .024(1)  .004(1)
  P1  .052(1)  .039(1)  .038(1)  .008(1)  .015(1)  -.002(1)
  O1  .27(1)  .076(6)  .17(1)  -.005(8)  .080(9)  .052(7)
  O2  .19(1)  .134(8)  .108(7)  -.060(7)  .083(7)  -.066(6)
  O3  .123(9)  .29(2)  .25(1)  .08(1)  .063(9)  -.09(1)
  O4  .16(1)  .22(1)  .21(1)  .00(1)  -.085(9)  -.04(1)
  O5  .148(9)  .094(8)  .36(2)  .034(7)  .07(1)  .078(9)
  N1  .040(4)  .036(4)  .042(4)  .003(3)  .014(3)  -.001(3)
  N2  .053(4)  .043(4)  .054(5)  .004(3)  .011(4)  -.001(4)
  N3  .054(5)  .048(5)  .086(6)  -.008(4)  .012(4)  -.008(4)
  C1  .069(6)  .082(7)  .046(5)  .020(5)  .031(5)  .001(5)
  C2  .046(5)  .045(5)  .053(5)  .007(4)  .023(4)  .002(4)
  C3  .051(6)  .078(7)  .083(7)  -.004(5)  .032(5)  .017(6)
  C4  .051(6)  .070(7)  .103(8)  -.011(5)  .019(6)  .003(6)
  C5  .065(6)  .055(6)  .055(6)  -.004(5)  .014(5)  -.012(5)
  C6  .042(5)  .044(5)  .038(5)  -.007(4)  .009(4)  -.006(4)
  C7  .062(6)  .076(7)  .046(5)  -.004(5)  .017(5)  -.004(5)
  C8  .079(7)  .059(6)  .043(5)  .012(5)  .022(5)  -.006(5)
  C9  .074(6)  .047(5)  .036(5)  .012(5)  .017(4)  -.002(4)
  C10  .062(6)  .036(5)  .055(6)  .003(4)  .024(5)  .005(4)
  C11  .065(6)  .055(6)  .040(5)  .012(5)  .018(4)  .005(4)
  C12  .046(5)  .047(5)  .056(6)  .015(4)  .010(4)  -.006(4)
  C13  .060(6)  .073(7)  .073(7)  .015(5)  .023(5)  .005(5)
  C14  .053(6)  .103(9)  .12(1)  .012(6)  .039(6)  -.012(8)
  C15  .051(6)  .11(1)  .11(1)  .026(7)  -.001(6)  -.040(8)
  C16  .076(7)  .086(8)  .070(7)  .039(6)  -.007(6)  -.009(6)
  C17  .074(7)  .072(7)  .058(6)  .021(6)  .011(5)  -.009(5)
  C18  .050(5)  .043(5)  .066(6)  .006(4)  .009(5)  .000(5)
  C20  .097(9)  .100(9)  .097(9)  -.014(7)  .031(7)  -.046(7)
  C21  .09(1)  .21(2)  .36(3)  -.10(1)  .08(1)  -.15(2)
 
_atom_sites_solution_primary       direct
_atom_sites_solution_secondary     difmap
_atom_sites_solution_hydrogens     geom
 
_refine_special_details 
; 
H atoms at calculated positions, H atoms of C(21) not 
positioned, methyl group C(19) refined as rigid group.
;

_refine_ls_structure_factor_coef   F                                    #ActaC
_refine_ls_matrix_type             atomblock                            #ActaC
_refine_ls_weighting_scheme        sigma                                #ActaC
_refine_ls_hydrogen_treatment      geom                                 #ActaC
_refine_ls_extinction_method       none                                 #ActaC
_refine_ls_extinction_coef         .00000                               #ActaC
_refine_ls_extinction_expression   ?
_refine_ls_abs_structure_details   none                                 #ActaC
_refine_ls_abs_structure_Flack     0                                    #ActaC
_refine_ls_number_reflns           3083                                 #ActaC
_refine_ls_number_parameters       334                                  #ActaC
_refine_ls_number_restraints       0                                    #ActaC
_refine_ls_number_constraints      0                                    #ActaC
_refine_ls_R_factor_all            ?                                    #ActaC
_refine_ls_R_factor_obs            0.071                               #ActaC
_refine_ls_wR_factor_all           ?                                    #ActaC
_refine_ls_wR_factor_obs              .076                              #ActaC
_refine_ls_goodness_of_fit_all       ?                                  #ActaC
_refine_ls_goodness_of_fit_obs       2.242                              #ActaC
_refine_ls_shift/esd_max              .026                              #ActaC
_refine_ls_shift/esd_mean             .002                              #ActaC
_refine_diff_density_min              -.726                             #ActaC
_refine_diff_density_max              .831                              #ActaC
 
 
_geom_special_details              ?                                    #ActaC
 
loop_
_geom_bond_atom_site_label_1                                            #ActaC
_geom_bond_atom_site_label_2                                            #ActaC
_geom_bond_distance                                                     #ActaC
_geom_bond_site_symmetry_1                                              #ActaC
_geom_bond_site_symmetry_2                                              #ActaC
_geom_bond_publ_flag                                                    #ActaC
  Ni1  S1  2.442(3)  .  .  Y
  Ni1  S2  2.442(3)  .  .  Y
  Ni1  P1  2.342(2)  .  .  Y
  Ni1  N1  2.082(6)  .  .  Y
  Ni1  N2  2.091(7)  .  .  Y
  Ni1  N3  2.022(7)  .  .  Y
  Cl1  O1  1.33(1)  .  .  ?
  Cl1  O2  1.37(1)  .  .  ?
  Cl1  O3  1.37(1)  .  .  ?
  Cl1  O4  1.43(1)  .  .  ?
  Cl2  O5  1.38(1)  .  .  ?
  Cl2  O6A  1.43(2)  .  .  ?
  Cl2  O7A  1.34(2)  .  .  ?
  Cl2  O8A  1.33(2)  .  .  ?
  Cl2  O6B  1.37(1)  .  .  ?
  Cl2  O7B  1.44(2)  .  .  ?
  Cl2  O8B  1.41(1)  .  .  ?
  S1  C1  1.797(9)  .  .  Y
  S1  C11  1.817(9)  .  .  Y
  S2  C7  1.811(9)  .  .  Y
  S2  C8  1.817(9)  .  .  Y
  P1  C9  1.822(8)  .  .  Y
  P1  C10  1.82(1)  .  .  Y
  P1  C12  1.834(8)  .  .  Y
  O6A  O6B  1.26(3)  .  .  ?
  O6A  O7B  1.65(2)  .  .  ?
  O7A  O7B  1.01(2)  .  .  ?
  O7A  O8B  1.48(3)  .  .  ?
  O8A  O6B  1.32(2)  .  .  ?
  O8A  O8B  1.34(2)  .  .  ?
  N1  C2  1.35(1)  .  .  Y
  N1  C6  1.347(9)  .  .  Y
  N2  C18  1.11(1)  .  .  Y
  N3  C20  1.12(1)  .  .  Y
  C1  C2  1.51(1)  .  .  Y
  C1  H1A  .95(1)  .  .  ?
  C1  H1B  .95(1)  .  .  ?
  C2  C3  1.38(1)  .  .  ?
  C3  C4  1.36(1)  .  .  ?
  C3  H3  .95(1)  .  .  ?
  C4  C5  1.40(2)  .  .  ?
  C4  H4  .950(9)  .  .  ?
  C5  C6  1.36(1)  .  .  ?
  C5  H5  .950(8)  .  .  ?
  C6  C7  1.47(1)  .  .  Y
  C7  H7A  .950(9)  .  .  ?
  C7  H7B  .950(9)  .  .  ?
  C8  C9  1.53(1)  .  .  Y
  C8  H8A  .95(1)  .  .  ?
  C8  H8B  .950(8)  .  .  ?
  C9  H9A  .950(9)  .  .  ?
  C9  H9B  .950(9)  .  .  ?
  C10  C11  1.55(1)  .  .  Y
  C10  H10A  .950(8)  .  .  ?
  C10  H10B  .950(8)  .  .  ?
  C11  H11A  .950(8)  .  .  ?
  C11  H11B  .95(1)  .  .  ?
  C12  C13  1.37(1)  .  .  ?
  C12  C17  1.39(1)  .  .  ?
  C13  C14  1.37(1)  .  .  ?
  C13  H13  .950(9)  .  .  ?
  C14  C15  1.36(2)  .  .  ?
  C14  H14  .95(1)  .  .  ?
  C15  C16  1.36(2)  .  .  ?
  C15  H15  .950(9)  .  .  ?
  C16  C17  1.39(1)  .  .  ?
  C16  H16  .95(1)  .  .  ?
  C17  H17  .95(1)  .  .  ?
  C18  C19  1.44(1)  .  .  ?
  C19  H19A  .95(5)  .  .  ?
  C19  H19B  .95(5)  .  .  ?
  C19  H19C  .95(3)  .  .  ?
  C20  C21  1.54(2)  .  .  ?
 
loop_
_geom_contact_atom_site_label_1                                         #ActaC
_geom_contact_atom_site_label_2                                         #ActaC
_geom_contact_distance                                                  #ActaC
_geom_contact_site_symmetry_1                                           #ActaC
_geom_contact_site_symmetry_2                                           #ActaC
_geom_contact_publ_flag                                                 #ActaC
                                   ?  ?  ?  ?  ?  ?
 
loop_
_geom_angle_atom_site_label_1                                           #ActaC
_geom_angle_atom_site_label_2                                           #ActaC
_geom_angle_atom_site_label_3                                           #ActaC
_geom_angle                                                             #ActaC
_geom_angle_site_symmetry_1                                             #ActaC
_geom_angle_site_symmetry_2                                             #ActaC
_geom_angle_site_symmetry_3                                             #ActaC
_geom_angle_publ_flag                                                   #ActaC
  S1  Ni1  S2  163.61(9)  .  .  .  Y
  S1  Ni1  P1  84.91(8)  .  .  .  Y
  S1  Ni1  N1  84.2(2)  .  .  .  Y
  S1  Ni1  N2  93.1(2)  .  .  .  ?
  S1  Ni1  N3  98.5(2)  .  .  .  ?
  S2  Ni1  P1  85.50(8)  .  .  .  Y
  S2  Ni1  N1  83.0(2)  .  .  .  Y
  S2  Ni1  N2  96.3(2)  .  .  .  ?
  S2  Ni1  N3  95.5(2)  .  .  .  ?
  P1  Ni1  N1  92.4(2)  .  .  .  Y
  P1  Ni1  N2  178.0(2)  .  .  .  Y
  P1  Ni1  N3  94.8(2)  .  .  .  ?
  N1  Ni1  N2  87.1(2)  .  .  .  ?
  N1  Ni1  N3  172.5(3)  .  .  .  Y
  N2  Ni1  N3  85.8(3)  .  .  .  Y
  O1  Cl1  O2  107.4(7)  .  .  .  ?
  O1  Cl1  O3  111.4(8)  .  .  .  ?
  O1  Cl1  O4  113.5(7)  .  .  .  ?
  O2  Cl1  O3  111.0(7)  .  .  .  ?
  O2  Cl1  O4  107.5(7)  .  .  .  ?
  O3  Cl1  O4  105.9(8)  .  .  .  ?
  O5  Cl2  O6A  96.9(9)  .  .  .  ?
  O5  Cl2  O7A  111(1)  .  .  .  ?
  O5  Cl2  O8A  106(1)  .  .  .  ?
  O5  Cl2  O6B  118(1)  .  .  .  ?
  O5  Cl2  O7B  107(1)  .  .  .  ?
  O5  Cl2  O8B  104.5(8)  .  .  .  ?
  O6A  Cl2  O7A  111(1)  .  .  .  ?
  O6A  Cl2  O8A  112(1)  .  .  .  ?
  O6A  Cl2  O6B  54(1)  .  .  .  ?
  O6A  Cl2  O7B  70(1)  .  .  .  ?
  O6A  Cl2  O8B  158(1)  .  .  .  ?
  O7A  Cl2  O8A  118(1)  .  .  .  ?
  O7A  Cl2  O6B  130(1)  .  .  .  ?
  O7A  Cl2  O7B  42(1)  .  .  .  ?
  O7A  Cl2  O8B  65(1)  .  .  .  ?
  O8A  Cl2  O6B  59(1)  .  .  .  ?
  O8A  Cl2  O7B  146(1)  .  .  .  ?
  O8A  Cl2  O8B  59(1)  .  .  .  ?
  O6B  Cl2  O7B  109.0(9)  .  .  .  ?
  O6B  Cl2  O8B  111(1)  .  .  .  ?
  O7B  Cl2  O8B  106.8(9)  .  .  .  ?
  Ni1  S1  C1  95.7(3)  .  .  .  ?
  Ni1  S1  C11  103.7(3)  .  .  .  ?
  C1  S1  C11  100.6(4)  .  .  .  Y
  Ni1  S2  C7  96.0(3)  .  .  .  ?
  Ni1  S2  C8  103.5(3)  .  .  .  ?
  C7  S2  C8  101.6(4)  .  .  .  Y
  Ni1  P1  C9  104.7(3)  .  .  .  ?
  Ni1  P1  C10  103.4(3)  .  .  .  ?
  Ni1  P1  C12  121.9(3)  .  .  .  ?
  C9  P1  C10  109.4(4)  .  .  .  Y
  C9  P1  C12  108.7(4)  .  .  .  ?
  C10  P1  C12  108.2(4)  .  .  .  ?
  Cl2  O6A  O6B  60.5(9)  .  .  .  ?
  Cl2  O6A  O7B  55.2(8)  .  .  .  ?
  O6B  O6A  O7B  103(1)  .  .  .  ?
  Cl2  O7A  O7B  74(1)  .  .  .  ?
  Cl2  O7A  O8B  60(1)  .  .  .  ?
  O7B  O7A  O8B  133(2)  .  .  .  ?
  Cl2  O8A  O6B  62(1)  .  .  .  ?
  Cl2  O8A  O8B  64(1)  .  .  .  ?
  O6B  O8A  O8B  118(2)  .  .  .  ?
  Cl2  O6B  O6A  66(1)  .  .  .  ?
  Cl2  O6B  O8A  59(1)  .  .  .  ?
  O6A  O6B  O8A  124(2)  .  .  .  ?
  Cl2  O7B  O6A  54.8(8)  .  .  .  ?
  Cl2  O7B  O7A  64(1)  .  .  .  ?
  O6A  O7B  O7A  117(2)  .  .  .  ?
  Cl2  O8B  O7A  55.3(9)  .  .  .  ?
  Cl2  O8B  O8A  58(1)  .  .  .  ?
  O7A  O8B  O8A  108(1)  .  .  .  ?
  Ni1  N1  C2  120.2(4)  .  .  .  ?
  Ni1  N1  C6  121.5(6)  .  .  .  ?
  C2  N1  C6  118.3(6)  .  .  .  ?
  Ni1  N2  C18  174.2(6)  .  .  .  Y
  Ni1  N3  C20  172.6(9)  .  .  .  Y
  S1  C1  C2  116.4(7)  .  .  .  Y
  S1  C1  H1A  107.7(7)  .  .  .  ?
  S1  C1  H1B  107.7(6)  .  .  .  ?
  C2  C1  H1A  107.7(7)  .  .  .  ?
  C2  C1  H1B  107.7(8)  .  .  .  ?
  H1A  C1  H1B  109(1)  .  .  .  ?
  N1  C2  C1  118.7(7)  .  .  .  ?
  N1  C2  C3  122.0(7)  .  .  .  ?
  C1  C2  C3  119.1(9)  .  .  .  ?
  C2  C3  C4  119(1)  .  .  .  ?
  C2  C3  H3  120.5(9)  .  .  .  ?
  C4  C3  H3  120.5(9)  .  .  .  ?
  C3  C4  C5  119.2(9)  .  .  .  ?
  C3  C4  H4  120(1)  .  .  .  ?
  C5  C4  H4  120(1)  .  .  .  ?
  C4  C5  C6  119.3(8)  .  .  .  ?
  C4  C5  H5  120.4(9)  .  .  .  ?
  C6  C5  H5  120(1)  .  .  .  ?
  N1  C6  C5  122.1(8)  .  .  .  ?
  N1  C6  C7  118.7(7)  .  .  .  ?
  C5  C6  C7  118.9(7)  .  .  .  ?
  S2  C7  C6  116.5(5)  .  .  .  Y
  S2  C7  H7A  107.7(7)  .  .  .  ?
  S2  C7  H7B  107.7(8)  .  .  .  ?
  C6  C7  H7A  107.7(9)  .  .  .  ?
  C6  C7  H7B  107.7(8)  .  .  .  ?
  H7A  C7  H7B  109.5(8)  .  .  .  ?
  S2  C8  C9  115.3(7)  .  .  .  Y
  S2  C8  H8A  108.0(7)  .  .  .  ?
  S2  C8  H8B  108.0(6)  .  .  .  ?
  C9  C8  H8A  108.0(7)  .  .  .  ?
  C9  C8  H8B  108.0(8)  .  .  .  ?
  H8A  C8  H8B  109(1)  .  .  .  ?
  P1  C9  C8  109.5(6)  .  .  .  Y
  P1  C9  H9A  109.5(5)  .  .  .  ?
  P1  C9  H9B  109.5(7)  .  .  .  ?
  C8  C9  H9A  109.5(9)  .  .  .  ?
  C8  C9  H9B  109.5(7)  .  .  .  ?
  H9A  C9  H9B  109.5(8)  .  .  .  ?
  P1  C10  C11  107.9(6)  .  .  .  Y
  P1  C10  H10A  109.9(7)  .  .  .  ?
  P1  C10  H10B  109.9(6)  .  .  .  ?
  C11  C10  H10A  109.9(7)  .  .  .  ?
  C11  C10  H10B  109.9(8)  .  .  .  ?
  H10A  C10  H10B  109.5(8)  .  .  .  ?
  S1  C11  C10  113.5(5)  .  .  .  Y
  S1  C11  H11A  108.5(7)  .  .  .  ?
  S1  C11  H11B  108.5(7)  .  .  .  ?
  C10  C11  H11A  108.5(8)  .  .  .  ?
  C10  C11  H11B  108.5(8)  .  .  .  ?
  H11A  C11  H11B  109.5(7)  .  .  .  ?
  P1  C12  C13  119.7(6)  .  .  .  ?
  P1  C12  C17  121.4(7)  .  .  .  ?
  C13  C12  C17  118.8(8)  .  .  .  ?
  C12  C13  C14  120.7(9)  .  .  .  ?
  C12  C13  H13  119.7(9)  .  .  .  ?
  C14  C13  H13  120(1)  .  .  .  ?
  C13  C14  C15  121(1)  .  .  .  ?
  C13  C14  H14  120(1)  .  .  .  ?
  C15  C14  H14  119.5(9)  .  .  .  ?
  C14  C15  C16  119.0(9)  .  .  .  ?
  C14  C15  H15  120(1)  .  .  .  ?
  C16  C15  H15  120(1)  .  .  .  ?
  C15  C16  C17  121.2(9)  .  .  .  ?
  C15  C16  H16  119(1)  .  .  .  ?
  C17  C16  H16  119(1)  .  .  .  ?
  C12  C17  C16  119.1(9)  .  .  .  ?
  C12  C17  H17  120.4(9)  .  .  .  ?
  C16  C17  H17  120.4(9)  .  .  .  ?
  N2  C18  C19  178(1)  .  .  .  ?
  C18  C19  H19A  108(4)  .  .  .  ?
  C18  C19  H19B  104(4)  .  .  .  ?
  C18  C19  H19C  115(5)  .  .  .  ?
  H19A  C19  H19B  109(5)  .  .  .  ?
  H19A  C19  H19C  110(6)  .  .  .  ?
  H19B  C19  H19C  110(5)  .  .  .  ?
  N3  C20  C21  176(1)  .  .  .  ?
 
  
_reflns_limit_h_min                -15
_reflns_limit_h_max                14
_reflns_limit_k_min                0
_reflns_limit_k_max                15
_reflns_limit_l_min                0
_reflns_limit_l_max                20
_reflns_number_total               5251                                 #ActaC
_reflns_number_observed            3087                                 #ActaC
_reflns_observed_criterion         refl_observed_if_F____>_4__sigma(F___)
_reflns_d_resolution_high             .841
_reflns_d_resolution_low             9.027
 
loop_
_reflns_scale_group_code
_reflns_scale_meas_F
  ?  .647047
 
loop_
_refln_index_h
_refln_index_k
_refln_index_l
_refln_F_meas
_refln_F_calc
_refln_F_sigma
_refln_observed_status
_refln_scale_group_code
                                   ?  ?  ?  ?  ?  ?  ?  ?
 
data_compound_2_for_IC9714753
 
_audit_creation_date               97-00-12
_audit_creation_method             from_xtal_archive_file_using_CIFIO
_audit_update_record               ?
 
_chemical_compound_source          'synthesis'                           #ActaC
_chemical_name_systematic          ?                                     #ActaC
_chemical_name_common              ?                                     #ActaC
_chemical_formula_analytical       ?                                     #ActaC
_chemical_formula_moiety           'C34 H40 N2 Ni O2 P2 S4, 2(Cl O4)'    #ActaC
_chemical_formula_structural       'C34 H40 N2 Ni O2 P2 S4, (Cl O4)2'    #ActaC
_chemical_formula_sum              'C34 H40 Cl2 N2 Ni O10 P2 S4'         #ActaC
_chemical_formula_weight           956.47                                #ActaC
_chemical_melting_point            'not measured'                        #ActaC
 
_computing_data_collection  
;
MSC/AFC Diffractometer Control Software (Molecular Structure Corporation, 
1993)
;
_computing_cell_refinement 
;
MSC/AFC Diffractometer Control Software (Molecular Structure Corporation, 
1993)
;
_computing_data_reduction 
;
Texsan Process (Molecular Structure Corporation ,1993)
;
_computing_structure_solution      'SHELXS86 (Sheldrick, 1985)'
_computing_structure_refinement    'xtal_CRYLSQ (Hall, Flack & Stewart, 1992)'
_computing_molecular_graphics      xtal_ORTEP                            #ActaC
_computing_publication_material    xtal_BONDLA_CIFIO                     #ActaC
 
_cell_length_a                     10.564(1)                             #ActaC
_cell_length_b                     11.975(2)                             #ActaC
_cell_length_c                     9.124(2)                              #ActaC
_cell_angle_alpha                  109.79(1)                             #ActaC
_cell_angle_beta                   95.67(2)                              #ActaC
_cell_angle_gamma                  109.19(1)                             #ActaC
_cell_volume                       996.6(3)                              #ActaC
_cell_formula_units_Z              1                                     #ActaC
_cell_measurement_temperature      294                                   #ActaC
_cell_measurement_reflns_used      25                                    #ActaC
_cell_measurement_theta_min        14.0                                  #ActaC
_cell_measurement_theta_max        17.8                                  #ActaC
_cell_special_details                                                    #ActaC
;
 ?
;
 
_symmetry_cell_setting             triclinic                             #ActaC
_symmetry_space_group_name_H-M     'P -1'                                #ActaC
_symmetry_space_group_name_Hall    -P_1                                  #ActaC
loop_
_symmetry_equiv_pos_as_xyz                                               #ActaC
  +x,+y,+z  -x,-y,-z
 
_exptl_crystal_description         plate                                 #ActaC
_exptl_crystal_preparation         ?
_exptl_crystal_colour              green                                 #ActaC
_exptl_crystal_size_max            0.30                                  #ActaC
_exptl_crystal_size_mid            0.22                                  #ActaC
_exptl_crystal_size_min            0.14                                  #ActaC
_exptl_crystal_density_diffrn        1.594                               #ActaC
_exptl_crystal_density_meas        'not measured'                        #ActaC
_exptl_crystal_density_method      ?                                     #ActaC
_exptl_crystal_F_000               ?                                     #ActaC
 
_exptl_absorpt_process_details     ?
_exptl_absorpt_coefficient_mu      0.97                                  #ActaC
_exptl_absorpt_correction_type     'empirical via \y scans'              #ActaC
_exptl_absorpt_correction_T_min    0.79                                  #ActaC
_exptl_absorpt_correction_T_max    1.00                                  #ActaC
_exptl_special_details                                                   #ActaC
;
 ?
;
 
_diffrn_special_details
;
 ?
;
_diffrn_ambient_temperature        294                                  #ActaC
_diffrn_radiation_wavelength       0.71069                              #ActaC
_diffrn_radiation_type             MoK\a                                #ActaC
_diffrn_radiation_source           'fine-focus sealed tube'             #ActaC
 
_diffrn_radiation_monochromator    graphite                             #ActaC
_diffrn_radiation_detector         ?                                    #ActaC
_diffrn_measurement_device         'Rigaku AFC5S'                       #ActaC
_diffrn_measurement_method         '\w--2\q'                            #ActaC
 
_diffrn_standards_number           3                                    #ActaC
_diffrn_standards_interval_count   150                                  #ActaC
_diffrn_standards_interval_time    ?                                    #ActaC
_diffrn_standards_decay_%          0.5                                  #ActaC
 
loop_
_diffrn_standard_refln_index_h                                          #ActaC
_diffrn_standard_refln_index_k                                          #ActaC
_diffrn_standard_refln_index_l                                          #ActaC
  ?  ?  ?
 
loop_
_diffrn_attenuator_code
_diffrn_attenuator_scale
  ?  ?
 
_diffrn_reflns_number              3717                                 #ActaC
_diffrn_reflns_av_R_equivalents    0.026                                #ActaC
_diffrn_reflns_av_sigmaI/netI      0.060                                #ActaC
_diffrn_reflns_limit_h_min         0                                    #ActaC
_diffrn_reflns_limit_h_max         12                                   #ActaC
_diffrn_reflns_limit_k_min         -14                                  #ActaC
_diffrn_reflns_limit_k_max         14                                   #ActaC
_diffrn_reflns_limit_l_min         -10                                  #ActaC
_diffrn_reflns_limit_l_max         10                                   #ActaC
_diffrn_reflns_theta_min              1.96                              #ActaC
_diffrn_reflns_theta_max             24.99                              #ActaC
_diffrn_reflns_reduction_process   ?                                    #ActaC
 
loop_
_atom_type_symbol                                                       #ActaC
_atom_type_description                                                  #ActaC
_atom_type_oxidation_number
_atom_type_number_in_cell
_atom_type_scat_dispersion_real                                         #ActaC
_atom_type_scat_dispersion_imag                                         #ActaC
_atom_type_scat_source                                                  #ActaC
 'Ni'  'Ni'  0  1  .284973   1.113  Int._Tables_Vol_IV_Tables_2.2B_and_2.3.1
 'Cl' 'Cl'    0  2  .132019  .158997  Int._Tables_Vol_IV_Tables_2.2B_and_2.3.1
 'S'  'S'    0  4  .109985  .124023  Int._Tables_Vol_IV_Tables_2.2B_and_2.3.1
 'P' 'P'    0  2  .090027  .094971  Int._Tables_Vol_IV_Tables_2.2B_and_2.3.1
 'O' 'O'    0  10  .007996  .005981  Int._Tables_Vol_IV_Tables_2.2B_and_2.3.1
 'N'  'N'    0  2  .004028  .002991  Int._Tables_Vol_IV_Tables_2.2B_and_2.3.1
 'C'  'C'    0  34  .002014  .002014  Int._Tables_Vol_IV_Tables_2.2B_and_2.3.1
 'H' 'H'    0  40  0  0  Int._Tables_Vol_IV_Tables_2.2B_and_2.3.1
 
loop_
_atom_site_label                                                        #ActaC
_atom_site_fract_x                                                      #ActaC
_atom_site_fract_y                                                      #ActaC
_atom_site_fract_z                                                      #ActaC
_atom_site_U_iso_or_equiv                                               #ActaC
_atom_site_thermal_displace_type                                        #ActaC
_atom_site_calc_flag                                                    #ActaC
_atom_site_calc_attached_atom                                           #ActaC
  Ni1  1.00000  1.00000  .50000  .0291(4)  Uani  ?  ?
  Cl1  .7252(2)  1.3955(2)  .2476(2)  .0566(8)  Uani  ?  ?
  S1  .9869(2)  1.1000(2)  .3079(2)  .0380(7)  Uani  ?  ?
  S2  .5430(2)  .8654(2)  .5184(2)  .0508(8)  Uani  ?  ?
  P1  .7207(2)  .8024(2)  .2212(2)  .0363(7)  Uani  ?  ?
  O1  .8369(4)  .8364(4)  .3602(5)  .036(2)  Uani  ?  ?
  O2  .8564(8)  1.4206(9)  .330(1)  .115(5)  Uani  ?  ?
  O3  .6492(8)  1.437(1)  .3545(9)  .128(5)  Uani  ?  ?
  O4  .740(1)  1.464(1)  .149(1)  .178(8)  Uani  ?  ?
  O5  .655(1)  1.2680(9)  .141(1)  .145(5)  Uani  ?  ?
  N1  .8641(5)  1.0983(5)  .5881(6)  .033(2)  Uani  ?  ?
  C1  .9860(7)  1.2408(6)  .4626(9)  .043(3)  Uani  ?  ?
  C2  .9019(7)  1.2138(6)  .5802(8)  .037(3)  Uani  ?  ?
  C3  .8670(8)  1.3108(7)  .6781(9)  .050(3)  Uani  ?  ?
  C4  .7926(8)  1.2886(8)  .786(1)  .060(4)  Uani  ?  ?
  C5  .7442(7)  1.1667(8)  .7872(9)  .050(3)  Uani  ?  ?
  C6  .7785(7)  1.0729(7)  .6840(8)  .042(3)  Uani  ?  ?
  C7  .7084(7)  .9355(7)  .6635(8)  .045(3)  Uani  ?  ?
  C8  .5382(8)  .7083(7)  .396(1)  .052(3)  Uani  ?  ?
  C9  .5605(7)  .6913(7)  .2309(9)  .050(3)  Uani  ?  ?
  C10  .6966(7)  .9417(7)  .2108(8)  .044(3)  Uani  ?  ?
  C11  .8173(7)  1.0320(7)  .1733(8)  .044(3)  Uani  ?  ?
  C12  .7574(7)  .7269(6)  .0339(8)  .040(3)  Uani  ?  ?
  C13  .8781(8)  .7079(8)  .0299(9)  .051(3)  Uani  ?  ?
  C14  .9063(9)  .6488(8)  -.116(1)  .058(4)  Uani  ?  ?
  C15  .8112(8)  .6063(7)  -.2560(8)  .048(3)  Uani  ?  ?
  C16  .6913(8)  .6243(7)  -.2555(9)  .050(3)  Uani  ?  ?
  C17  .6630(8)  .6855(7)  -.1094(8)  .048(3)  Uani  ?  ?
  H1A  1.07855  1.29408  .52078  .07000  Uiso  ?  ?
  H1B  .94964  1.28528  .41280  .07000  Uiso  ?  ?
  H3  .89475  1.39196  .66982  .07000  Uiso  ?  ?
  H4  .77409  1.35600  .85960  .07000  Uiso  ?  ?
  H5  .68830  1.14795  .85799  .07000  Uiso  ?  ?
  H7A  .76410  .88905  .62523  .07000  Uiso  ?  ?
  H7B  .69366  .93235  .76332  .07000  Uiso  ?  ?
  H8A  .60808  .69332  .45132  .07000  Uiso  ?  ?
  H8B  .45047  .64591  .38524  .07000  Uiso  ?  ?
  H9A  .55758  .60665  .17971  .07000  Uiso  ?  ?
  H9B  .48699  .70053  .17386  .07000  Uiso  ?  ?
  H10A  .61620  .91310  .12930  .07000  Uiso  ?  ?
  H10B  .68358  .98885  .31119  .07000  Uiso  ?  ?
  H11A  .82502  .98513  .06960  .07000  Uiso  ?  ?
  H11B  .79419  1.10189  .17171  .07000  Uiso  ?  ?
  H13  .94307  .73515  .12728  .07000  Uiso  ?  ?
  H14  .99137  .63798  -.11794  .07000  Uiso  ?  ?
  H15  .82959  .56360  -.35495  .07000  Uiso  ?  ?
  H16  .62664  .59555  -.35359  .07000  Uiso  ?  ?
  H17  .57908  .69859  -.10845  .07000  Uiso  ?  ?
 
loop_
_atom_site_aniso_label                                                  #ActaC
_atom_site_aniso_U_11                                                   #ActaC
_atom_site_aniso_U_22                                                   #ActaC
_atom_site_aniso_U_33                                                   #ActaC
_atom_site_aniso_U_12                                                   #ActaC
_atom_site_aniso_U_13                                                   #ActaC
_atom_site_aniso_U_23                                                   #ActaC
  Ni1  .0322(6)  .0286(6)  .0278(6)  .0119(5)  .0071(5)  .0124(5)
  Cl1  .056(1)  .069(1)  .050(1)  .035(1)  .0153(9)  .020(1)
  S1  .0422(9)  .0383(9)  .0394(9)  .0159(8)  .0112(7)  .0216(8)
  S2  .041(1)  .047(1)  .059(1)  .0144(9)  .0150(9)  .0158(9)
  P1  .0332(9)  .0347(9)  .0365(9)  .0119(7)  .0048(7)  .0109(8)
  O1  .035(2)  .030(2)  .037(2)  .008(2)  .001(2)  .011(2)
  O2  .075(5)  .146(8)  .144(7)  .066(5)  .012(5)  .062(6)
  O3  .095(6)  .189(9)  .066(5)  .076(6)  .022(4)  -.008(5)
  O4  .26(1)  .22(1)  .148(9)  .13(1)  .070(9)  .14(1)
  O5  .139(8)  .104(7)  .120(7)  .039(6)  .013(6)  -.026(6)
  N1  .032(3)  .033(3)  .033(3)  .013(2)  .008(2)  .012(2)
  C1  .051(4)  .033(4)  .048(4)  .015(3)  .012(3)  .022(3)
  C2  .036(4)  .036(4)  .042(4)  .016(3)  .008(3)  .017(3)
  C3  .051(5)  .039(4)  .058(5)  .023(4)  .008(4)  .013(4)
  C4  .050(5)  .052(5)  .059(5)  .024(4)  .007(4)  -.002(4)
  C5  .039(4)  .058(5)  .044(4)  .019(4)  .009(3)  .011(4)
  C6  .042(4)  .048(4)  .037(4)  .018(3)  .013(3)  .017(3)
  C7  .039(4)  .055(5)  .038(4)  .013(3)  .013(3)  .020(3)
  C8  .050(4)  .042(4)  .058(5)  .009(4)  .016(4)  .019(4)
  C9  .034(4)  .037(4)  .060(5)  .002(3)  .005(3)  .012(4)
  C10  .041(4)  .045(4)  .043(4)  .018(3)  -.001(3)  .016(3)
  C11  .046(4)  .041(4)  .039(4)  .011(3)  -.004(3)  .018(3)
  C12  .041(4)  .037(4)  .036(4)  .012(3)  .007(3)  .008(3)
  C13  .048(4)  .059(5)  .041(4)  .023(4)  .010(3)  .012(4)
  C14  .060(5)  .065(5)  .050(5)  .030(4)  .017(4)  .016(4)
  C15  .063(5)  .036(4)  .037(4)  .008(4)  .015(4)  .016(3)
  C16  .064(5)  .036(4)  .041(4)  .007(4)  .002(4)  .018(3)
  C17  .046(4)  .046(4)  .038(4)  .010(3)  .000(3)  .010(3)
 
_atom_sites_solution_primary       ?
_atom_sites_solution_secondary     ?
_atom_sites_solution_hydrogens     ?
 
_refine_special_details            ?
 
_refine_ls_structure_factor_coef   F                                    #ActaC
_refine_ls_matrix_type             full                                 #ActaC
_refine_ls_weighting_scheme        unit                                 #ActaC
_refine_ls_hydrogen_treatment      noref                                #ActaC
_refine_ls_extinction_method       none                                 #ActaC
_refine_ls_extinction_coef         .00000                               #ActaC
_refine_ls_extinction_expression   ?
_refine_ls_abs_structure_details   none                                 #ActaC
_refine_ls_abs_structure_Flack     0                                    #ActaC
_refine_ls_number_reflns           2658                                 #ActaC
_refine_ls_number_parameters       250                                  #ActaC
_refine_ls_number_restraints       0                                    #ActaC
_refine_ls_number_constraints      0                                    #ActaC
_refine_ls_R_factor_all               ?                                 #ActaC
_refine_ls_R_factor_obs               .059                              #ActaC
_refine_ls_wR_factor_all              ?                                 #ActaC
_refine_ls_wR_factor_obs              .067                              #ActaC
_refine_ls_goodness_of_fit_all        ?                                 #ActaC
_refine_ls_goodness_of_fit_obs       1.576                              #ActaC
_refine_ls_shift/esd_max              .012                              #ActaC
_refine_ls_shift/esd_mean             .003                              #ActaC
_refine_diff_density_min           -0.466                               #ActaC
_refine_diff_density_max           0.869                                #ActaC
 
 
_geom_special_details              ?                                    #ActaC
 
loop_
_geom_bond_atom_site_label_1                                            #ActaC
_geom_bond_atom_site_label_2                                            #ActaC
_geom_bond_distance                                                     #ActaC
_geom_bond_site_symmetry_1                                              #ActaC
_geom_bond_site_symmetry_2                                              #ActaC
_geom_bond_publ_flag                                                    #ActaC
  Ni1  S1  2.451(2)  .  .  Y
  Ni1  O1  2.022(3)  .  .  Y
  Ni1  N1  2.189(6)  .  .  Y
  Ni1  S1  2.451(2)  .  2_776  ?
  Ni1  O1  2.022(3)  .  2_776  ?
  Ni1  N1  2.189(6)  .  2_776  ?
  S1  C1  1.799(7)  .  .  Y
  S1  C11  1.819(7)  .  .  Y
  S2  C7  1.827(7)  .  .  Y
  S2  C8  1.814(8)  .  .  Y
  P1  O1  1.515(5)  .  .  Y
  P1  C9  1.809(7)  .  .  Y
  P1  C10  1.799(9)  .  .  Y
  P1  C12  1.789(7)  .  .  Y
  N1  C2  1.34(1)  .  .  Y
  N1  C6  1.35(1)  .  .  Y
  C1  C2  1.51(1)  .  .  Y
  C1  H1A  .950(6)  .  .  ?
  C1  H1B  .950(9)  .  .  ?
  C2  C3  1.39(1)  .  .  ?
  C3  C4  1.36(1)  .  .  ?
  C3  H3  .950(9)  .  .  ?
  C4  C5  1.38(1)  .  .  ?
  C4  H4  .950(9)  .  .  ?
  C5  C6  1.38(1)  .  .  ?
  C5  H5  .950(8)  .  .  ?
  C6  C7  1.50(1)  .  .  Y
  C7  H7A  .950(9)  .  .  ?
  C7  H7B  .950(8)  .  .  ?
  C8  C9  1.51(1)  .  .  Y
  C8  H8A  .95(1)  .  .  ?
  C8  H8B  .950(7)  .  .  ?
  C9  H9A  .950(8)  .  .  ?
  C9  H9B  .950(9)  .  .  ?
  C10  C11  1.53(1)  .  .  Y
  C10  H10A  .950(7)  .  .  ?
  C10  H10B  .950(7)  .  .  ?
  C11  H11A  .950(7)  .  .  ?
  C11  H11B  .950(9)  .  .  ?
  C12  C13  1.37(1)  .  .  ?
  C12  C17  1.39(1)  .  .  ?
  C13  C14  1.39(1)  .  .  ?
  C13  H13  .950(8)  .  .  ?
  C14  C15  1.37(1)  .  .  ?
  C14  H14  .95(1)  .  .  ?
  C15  C16  1.35(1)  .  .  ?
  C15  H15  .950(8)  .  .  ?
  C16  C17  1.40(1)  .  .  ?
  C16  H16  .950(8)  .  .  ?
  C17  H17  .950(9)  .  .  ?
  Cl1  O2  1.394(9)  .  .  ?
  Cl1  O3  1.390(9)  .  .  ?
  Cl1  O4  1.40(2)  .  .  ?
  Cl1  O5  1.392(8)  .  .  ?

loop_
_geom_contact_atom_site_label_1                                         #ActaC
_geom_contact_atom_site_label_2                                         #ActaC
_geom_contact_distance                                                  #ActaC
_geom_contact_site_symmetry_1                                           #ActaC
_geom_contact_site_symmetry_2                                           #ActaC
_geom_contact_publ_flag                                                 #ActaC
                                  ?  ?  ?  ?  ?  ?
 
loop_
_geom_angle_atom_site_label_1                                           #ActaC
_geom_angle_atom_site_label_2                                           #ActaC
_geom_angle_atom_site_label_3                                           #ActaC
_geom_angle                                                             #ActaC
_geom_angle_site_symmetry_1                                             #ActaC
_geom_angle_site_symmetry_2                                             #ActaC
_geom_angle_site_symmetry_3                                             #ActaC
_geom_angle_publ_flag                                                   #ActaC
  S1  Ni1  O1  92.8(2)  .  .  .  Y
  S1  Ni1  N1  79.8(2)  .  .  .  Y
  S1  Ni1  S1  180.0000  .  .  2_776  ?
  S1  Ni1  O1  87.2(2)  .  .  2_776  ?
  S1  Ni1  N1  100.2(2)  .  .  2_776  ?
  O1  Ni1  N1  91.5(2)  .  .  .  Y
  O1  Ni1  S1  87.2(2)  .  .  2_776  ?
  O1  Ni1  O1  180.0(2)  .  .  2_776  ?
  O1  Ni1  N1  88.5(2)  .  .  2_776  ?
  N1  Ni1  S1  100.2(2)  .  .  2_776  ?
  N1  Ni1  O1  88.5(2)  .  .  2_776  ?
  N1  Ni1  N1  180.0000  .  .  2_776  ?
  S1  Ni1  O1  92.8(2)  2_776  .  2_776  ?
  S1  Ni1  N1  79.8(2)  2_776  .  2_776  ?
  O1  Ni1  N1  91.5(2)  2_776  .  2_776  ?
  Ni1  S1  C1  90.9(3)  .  .  .  Y
  Ni1  S1  C11  113.5(3)  .  .  .  Y
  C1  S1  C11  103.5(4)  .  .  .  Y
  C7  S2  C8  102.0(4)  .  .  .  Y
  O1  P1  C9  111.0(4)  .  .  .  Y
  O1  P1  C10  112.8(3)  .  .  .  Y
  O1  P1  C12  110.9(3)  .  .  .  Y
  C9  P1  C10  109.5(4)  .  .  .  Y
  C9  P1  C12  107.4(3)  .  .  .  Y
  C10  P1  C12  105.1(4)  .  .  .  Y
  Ni1  O1  P1  133.8(3)  .  .  .  Y
  Ni1  N1  C2  112.2(5)  .  .  .  ?
  Ni1  N1  C6  126.9(6)  .  .  .  ?
  C2  N1  C6  118.1(6)  .  .  .  ?
  S1  C1  C2  114.7(5)  .  .  .  Y
  S1  C1  H1A  108.1(7)  .  .  .  ?
  S1  C1  H1B  108.1(5)  .  .  .  ?
  C2  C1  H1A  108.1(6)  .  .  .  ?
  C2  C1  H1B  108.1(8)  .  .  .  ?
  H1A  C1  H1B  109.5(7)  .  .  .  ?
  N1  C2  C1  119.4(6)  .  .  .  ?
  N1  C2  C3  122.0(7)  .  .  .  ?
  C1  C2  C3  118.6(7)  .  .  .  ?
  C2  C3  C4  119.4(8)  .  .  .  ?
  C2  C3  H3  120.3(9)  .  .  .  ?
  C4  C3  H3  120.3(9)  .  .  .  ?
  C3  C4  C5  119.2(8)  .  .  .  ?
  C3  C4  H4  120.4(9)  .  .  .  ?
  C5  C4  H4  120.4(9)  .  .  .  ?
  C4  C5  C6  118.9(8)  .  .  .  ?
  C4  C5  H5  120.6(9)  .  .  .  ?
  C6  C5  H5  120.6(9)  .  .  .  ?
  N1  C6  C5  122.0(7)  .  .  .  ?
  N1  C6  C7  118.2(6)  .  .  .  ?
  C5  C6  C7  119.5(7)  .  .  .  ?
  S2  C7  C6  108.2(6)  .  .  .  Y
  S2  C7  H7A  109.8(5)  .  .  .  ?
  S2  C7  H7B  109.8(5)  .  .  .  ?
  C6  C7  H7A  109.8(7)  .  .  .  ?
  C6  C7  H7B  109.8(6)  .  .  .  ?
  H7A  C7  H7B  109.5(9)  .  .  .  ?
  S2  C8  C9  115.4(7)  .  .  .  Y
  S2  C8  H8A  108.0(5)  .  .  .  ?
  S2  C8  H8B  108.0(7)  .  .  .  ?
  C9  C8  H8A  108.0(8)  .  .  .  ?
  C9  C8  H8B  108.0(6)  .  .  .  ?
  H8A  C8  H8B  109(1)  .  .  .  ?
  P1  C9  C8  116.1(4)  .  .  .  Y
  P1  C9  H9A  107.8(6)  .  .  .  ?
  P1  C9  H9B  107.8(7)  .  .  .  ?
  C8  C9  H9A  107.8(8)  .  .  .  ?
  C8  C9  H9B  107.8(8)  .  .  .  ?
  H9A  C9  H9B  109.5(6)  .  .  .  ?
  P1  C10  C11  114.3(6)  .  .  .  Y
  P1  C10  H10A  108.3(5)  .  .  .  ?
  P1  C10  H10B  108.3(7)  .  .  .  ?
  C11  C10  H10A  108.3(8)  .  .  .  ?
  C11  C10  H10B  108.3(6)  .  .  .  ?
  H10A  C10  H10B  109.5(8)  .  .  .  ?
  S1  C11  C10  118.2(6)  .  .  .  Y
  S1  C11  H11A  107.2(6)  .  .  .  ?
  S1  C11  H11B  107.2(4)  .  .  .  ?
  C10  C11  H11A  107.2(5)  .  .  .  ?
  C10  C11  H11B  107.2(7)  .  .  .  ?
  H11A  C11  H11B  109.5(9)  .  .  .  ?
  P1  C12  C13  120.5(5)  .  .  .  ?
  P1  C12  C17  120.4(6)  .  .  .  ?
  C13  C12  C17  119.0(7)  .  .  .  ?
  C12  C13  C14  120.5(7)  .  .  .  ?
  C12  C13  H13  119.8(8)  .  .  .  ?
  C14  C13  H13  119.8(9)  .  .  .  ?
  C13  C14  C15  119.8(9)  .  .  .  ?
  C13  C14  H14  120.1(8)  .  .  .  ?
  C15  C14  H14  120.1(8)  .  .  .  ?
  C14  C15  C16  120.9(8)  .  .  .  ?
  C14  C15  H15  119.5(9)  .  .  .  ?
  C16  C15  H15  119.5(7)  .  .  .  ?
  C15  C16  C17  119.6(7)  .  .  .  ?
  C15  C16  H16  120.2(8)  .  .  .  ?
  C17  C16  H16  120.2(9)  .  .  .  ?
  C12  C17  C16  120.1(8)  .  .  .  ?
  C12  C17  H17  119.9(7)  .  .  .  ?
  C16  C17  H17  119.9(7)  .  .  .  ?
  O2  Cl1  O3  110.6(5)  .  .  .  ?
  O2  Cl1  O4  108.2(7)  .  .  .  ?
  O2  Cl1  O5  113.6(7)  .  .  .  ?
  O3  Cl1  O4  108.0(8)  .  .  .  ?
  O3  Cl1  O5  112.2(6)  .  .  .  ?
  O4  Cl1  O5  103.9(6)  .  .  .  ?

 
_reflns_limit_h_min                -12
_reflns_limit_h_max                12
_reflns_limit_k_min                -14
_reflns_limit_k_max                13
_reflns_limit_l_min                0
_reflns_limit_l_max                10
_reflns_number_total               3508                                 #ActaC
_reflns_number_observed            2658                                 #ActaC
_reflns_observed_criterion         refl_observed_if_F____>_4__sigma(F___)
_reflns_d_resolution_high             .841
_reflns_d_resolution_low            10.391
 
loop_
_reflns_scale_group_code
_reflns_scale_meas_F
  ?  .408509
 
loop_
_refln_index_h
_refln_index_k
_refln_index_l
_refln_F_meas
_refln_F_calc
_refln_F_sigma
_refln_observed_status
_refln_scale_group_code
                                   ?  ?  ?  ?  ?  ?  ?  ?
 
data_compound_4_for_IC9714753 
 
_audit_creation_method            SHELXL 
_chemical_name_systematic         ? 
_chemical_name_common             ? 
_chemical_formula_moiety          'C19 H20 N3 Ni P S4' 
_chemical_formula_structural      'C19 H20 N3 Ni P S4' 
_chemical_formula_analytical      ? 
_chemical_formula_sum             'C19 H20 N3 Ni P S4' 
_chemical_formula_weight          508.30 
_chemical_melting_point           ? 
_chemical_compound_source         'synthesis' 
 
loop_ 
 _atom_type_symbol 
 _atom_type_description 
 _atom_type_scat_dispersion_real 
 _atom_type_scat_dispersion_imag 
 _atom_type_scat_source 
 'C'  'C'   0.0033   0.0016 
 'International Tables Vol C Tables 4.2.6.8 and 6.1.1.4' 
 'H'  'H'   0.0000   0.0000 
 'International Tables Vol C Tables 4.2.6.8 and 6.1.1.4' 
 'N'  'N'   0.0061   0.0033 
 'International Tables Vol C Tables 4.2.6.8 and 6.1.1.4' 
 'Ni'  'Ni'   0.3393   1.1124 
 'International Tables Vol C Tables 4.2.6.8 and 6.1.1.4' 
 'P'  'P'   0.1023   0.0942 
 'International Tables Vol C Tables 4.2.6.8 and 6.1.1.4' 
 'S'  'S'   0.1246   0.1234 
 'International Tables Vol C Tables 4.2.6.8 and 6.1.1.4' 
 
_symmetry_cell_setting            monoclinic 
_symmetry_space_group_name_H-M    'P 1 21/n 1' 
 
loop_ 
 _symmetry_equiv_pos_as_xyz 
 'x, y, z' 
 'x+1/2, -y+1/2, z+1/2' 
 '-x, -y, -z' 
 '-x-1/2, y-1/2, -z-1/2' 
 
_cell_length_a                    11.139(2) 
_cell_length_b                    13.270(2) 
_cell_length_c                    14.8852(10) 
_cell_angle_alpha                 90.00 
_cell_angle_beta                  92.340(10) 
_cell_angle_gamma                 90.00 
_cell_volume                      2198.5(5) 
_cell_formula_units_Z             4 
_cell_measurement_temperature     293(2) 
_cell_measurement_reflns_used     25 
_cell_measurement_theta_min       23.87 
_cell_measurement_theta_max       24.82 
 
_exptl_crystal_description        plate 
_exptl_crystal_colour             blue 
_exptl_crystal_size_max           0.36 
_exptl_crystal_size_mid           0.34 
_exptl_crystal_size_min           0.18 
_exptl_crystal_density_meas       'not measured' 
_exptl_crystal_density_diffrn     1.536 
_exptl_crystal_density_method     ? 
_exptl_crystal_F_000              1048 
_exptl_absorpt_coefficient_mu     1.346 
_exptl_absorpt_correction_type    'empirical via \y scans' 
_exptl_absorpt_correction_T_min   0.85 
_exptl_absorpt_correction_T_max   1.00 
 
_exptl_special_details 
; 
 ? 
; 
 
_diffrn_ambient_temperature       293(2) 
_diffrn_radiation_wavelength      0.71069 
_diffrn_radiation_type            MoK\a 
_diffrn_radiation_source          'fine-focus sealed tube' 
_diffrn_radiation_monochromator   graphite 
_diffrn_measurement_device        'Rigaku AFC5S'
_diffrn_measurement_method        '\w--2\q' 
_diffrn_standards_number          3 
_diffrn_standards_interval_count  150 
_diffrn_standards_interval_time   ? 
_diffrn_standards_decay_%         0 
_diffrn_reflns_number             4293
_diffrn_reflns_av_R_equivalents   0.028 
_diffrn_reflns_av_sigmaI/netI     0.0326 
_diffrn_reflns_limit_h_min        0 
_diffrn_reflns_limit_h_max        13 
_diffrn_reflns_limit_k_min        0 
_diffrn_reflns_limit_k_max        15 
_diffrn_reflns_limit_l_min        -17 
_diffrn_reflns_limit_l_max        17 
_diffrn_reflns_theta_min          2.06 
_diffrn_reflns_theta_max          25.00 
_reflns_number_total              3879 
_reflns_number_observed           3089 
_reflns_observed_criterion        >2sigma(I) 
_computing_data_collection        
;
MSC/AFC Diffractometer Control Software (Molecular Structure 
Corporation, 1995)
;
_computing_cell_refinement        
;
MSC/AFC Diffractometer Control Software (Molecular Structure 
Corporation, 1995)
; 
_computing_data_reduction         
;
TEXSAN PROCESS (Molecular Structure Corporation, 1989)
; 
_computing_structure_solution     'SHELXS-86 (Sheldrick, 1990)' 
_computing_structure_refinement   'SHELXL-93 (Sheldrick, 1993)' 
_computing_molecular_graphics     'ORTEPII (Johnson, 1976)' 
_computing_publication_material   'SHELXL-93 (Sheldrick, 1993)' 
 
_refine_special_details 
; 
 Refinement on F^2^ for ALL reflections except for 0 with very negative F^2^ 
 or flagged by the user for potential systematic errors.  Weighted R-factors 
 wR and all goodnesses of fit S are based on F^2^, conventional R-factors R 
 are based on F, with F set to zero for negative F^2^. The observed criterion 
 of F^2^ > 2sigma(F^2^) is used only for calculating R_factor_obs etc. and is 
 not relevant to the choice of reflections for refinement.  R-factors based 
 on F^2^ are statistically about twice as large as those based on F, and R- 
 factors based on ALL data will be even larger. 
; 
 
_refine_ls_structure_factor_coef  Fsqd  
_refine_ls_matrix_type            full 
_refine_ls_weighting_scheme 
 'calc w=1/[\s^2^(Fo^2^)+(0.0233P)^2^+1.1068P] where P=(Fo^2^+2Fc^2^)/3' 
_atom_sites_solution_primary      direct 
_atom_sites_solution_secondary    difmap 
_atom_sites_solution_hydrogens    geom 
_refine_ls_hydrogen_treatment     refxyz 
_refine_ls_extinction_method      none 
_refine_ls_extinction_coef        ? 
_refine_ls_number_reflns          3879 
_refine_ls_number_parameters      313 
_refine_ls_number_restraints      0 
_refine_ls_R_factor_all           0.0483 
_refine_ls_R_factor_obs           0.0279 
_refine_ls_wR_factor_all          0.0659 
_refine_ls_wR_factor_obs          0.0588 
_refine_ls_goodness_of_fit_all    1.037 
_refine_ls_goodness_of_fit_obs    1.049 
_refine_ls_restrained_S_all       1.037 
_refine_ls_restrained_S_obs       1.049 
_refine_ls_shift/esd_max          0.001 
_refine_ls_shift/esd_mean         0.000 
 
loop_ 
 _atom_site_label 
 _atom_site_type_symbol 
 _atom_site_fract_x 
 _atom_site_fract_y 
 _atom_site_fract_z 
 _atom_site_U_iso_or_equiv 
 _atom_site_thermal_displace_type 
 _atom_site_occupancy 
 _atom_site_calc_flag 
 _atom_site_refinement_flags 
 _atom_site_disorder_group 
Ni1 Ni 0.10849(3) 0.68321(2) 0.73322(2) 0.02964(10) Uani 1 d . . 
S1 S 0.32300(6) 0.69895(5) 0.70353(5) 0.0404(2) Uani 1 d . . 
S2 S -0.08811(6) 0.60944(6) 0.76948(5) 0.0434(2) Uani 1 d . . 
S3 S 0.15789(9) 0.83947(7) 0.45526(6) 0.0720(3) Uani 1 d . . 
S4 S -0.09112(7) 0.94820(7) 0.86909(6) 0.0638(2) Uani 1 d . . 
P1 P 0.18141(6) 0.59080(5) 0.86003(4) 0.0324(2) Uani 1 d . . 
N1 N 0.1180(2) 0.5534(2) 0.65215(12) 0.0314(5) Uani 1 d . . 
N2 N 0.0735(2) 0.7564(2) 0.6124(2) 0.0452(6) Uani 1 d . . 
N3 N 0.0713(2) 0.8130(2) 0.79805(15) 0.0436(6) Uani 1 d . . 
C1 C 0.3165(3) 0.6130(2) 0.6091(2) 0.0408(7) Uani 1 d . . 
H1A H 0.3081(24) 0.6531(21) 0.5575(19) 0.049 Uiso 1 d . . 
H1B H 0.3921(25) 0.5828(21) 0.6076(18) 0.049 Uiso 1 d . . 
C2 C 0.2189(2) 0.5347(2) 0.6079(2) 0.0334(6) Uani 1 d . . 
C4 C 0.1380(3) 0.3810(2) 0.5496(2) 0.0544(8) Uani 1 d . . 
H4 H 0.1458(27) 0.3219(23) 0.5149(21) 0.065 Uiso 1 d . . 
C3 C 0.2320(3) 0.4479(2) 0.5577(2) 0.0449(7) Uani 1 d . . 
H3 H 0.3025(25) 0.4353(22) 0.5269(19) 0.054 Uiso 1 d . . 
C5 C 0.0329(3) 0.4021(2) 0.5911(2) 0.0519(8) Uani 1 d . . 
H5 H -0.0306(27) 0.3643(24) 0.5900(21) 0.062 Uiso 1 d . . 
C6 C 0.0245(2) 0.4893(2) 0.6418(2) 0.0378(6) Uani 1 d . . 
C7 C -0.0931(3) 0.5176(3) 0.6807(2) 0.0530(8) Uani 1 d . . 
H7A H -0.1379(27) 0.4612(25) 0.6996(20) 0.064 Uiso 1 d . . 
H7B H -0.1398(27) 0.5486(24) 0.6352(21) 0.064 Uiso 1 d . . 
C8 C -0.0515(3) 0.5299(3) 0.8663(2) 0.0519(8) Uani 1 d . . 
H8A H -0.0664(26) 0.5771(23) 0.9163(20) 0.062 Uiso 1 d . . 
H8B H -0.1097(27) 0.4792(25) 0.8660(20) 0.062 Uiso 1 d . . 
C9 C 0.0743(3) 0.4872(2) 0.8697(2) 0.0462(7) Uani 1 d . . 
H9A H 0.0901(25) 0.4410(22) 0.8202(20) 0.055 Uiso 1 d . . 
H9B H 0.0920(25) 0.4526(22) 0.9185(20) 0.055 Uiso 1 d . . 
C10 C 0.3258(3) 0.5391(2) 0.8282(2) 0.0477(8) Uani 1 d . . 
H10A H 0.3693(25) 0.5080(22) 0.8758(20) 0.057 Uiso 1 d . . 
H10B H 0.3075(25) 0.4882(23) 0.7831(20) 0.057 Uiso 1 d . . 
C11 C 0.4006(3) 0.6237(3) 0.7903(2) 0.0523(8) Uani 1 d . . 
H11A H 0.4729(27) 0.6002(23) 0.7666(20) 0.063 Uiso 1 d . . 
H11B H 0.4230(26) 0.6754(23) 0.8368(21) 0.063 Uiso 1 d . . 
C12 C 0.2006(2) 0.6414(2) 0.9737(2) 0.0322(6) Uani 1 d . . 
C13 C 0.1150(3) 0.7090(2) 1.0033(2) 0.0432(7) Uani 1 d . . 
H13 H 0.0525(25) 0.7313(22) 0.9641(18) 0.052 Uiso 1 d . . 
C14 C 0.1232(3) 0.7461(3) 1.0903(2) 0.0548(8) Uani 1 d . . 
H14 H 0.0641(28) 0.7887(24) 1.1091(21) 0.066 Uiso 1 d . . 
C15 C 0.2162(3) 0.7171(3) 1.1482(2) 0.0565(9) Uani 1 d . . 
H15 H 0.2246(27) 0.7382(25) 1.2057(21) 0.068 Uiso 1 d . . 
C16 C 0.3018(3) 0.6528(3) 1.1193(2) 0.0538(9) Uani 1 d . . 
H16 H 0.3623(28) 0.6324(24) 1.1535(21) 0.065 Uiso 1 d . . 
C17 C 0.2950(2) 0.6140(2) 1.0325(2) 0.0416(7) Uani 1 d . . 
H17 H 0.3509(25) 0.5721(21) 1.0128(19) 0.050 Uiso 1 d . . 
C18 C 0.1081(2) 0.7916(2) 0.5472(2) 0.0398(6) Uani 1 d . . 
C19 C 0.0034(2) 0.8694(2) 0.8272(2) 0.0350(6) Uani 1 d . . 
 
loop_ 
 _atom_site_aniso_label 
 _atom_site_aniso_U_11 
 _atom_site_aniso_U_22 
 _atom_site_aniso_U_33 
 _atom_site_aniso_U_23 
 _atom_site_aniso_U_13 
 _atom_site_aniso_U_12 
Ni1 0.0308(2) 0.0299(2) 0.0283(2) 0.00000(14) 0.00318(12) 0.00090(14) 
S1 0.0343(3) 0.0445(4) 0.0431(4) -0.0054(3) 0.0086(3) -0.0079(3) 
S2 0.0328(4) 0.0529(4) 0.0450(4) 0.0007(3) 0.0066(3) -0.0030(3) 
S3 0.0937(7) 0.0746(6) 0.0475(5) 0.0182(4) 0.0000(5) -0.0311(5) 
S4 0.0494(5) 0.0669(6) 0.0761(6) -0.0224(5) 0.0144(4) 0.0088(4) 
P1 0.0383(4) 0.0318(4) 0.0271(3) 0.0011(3) 0.0013(3) 0.0032(3) 
N1 0.0354(11) 0.0337(12) 0.0248(10) -0.0006(9) -0.0010(9) -0.0016(9) 
N2 0.0544(15) 0.0432(14) 0.0378(13) 0.0044(12) 0.0000(11) 0.0076(12) 
N3 0.0536(14) 0.0382(13) 0.0391(13) -0.0023(11) 0.0039(11) 0.0073(12) 
C1 0.037(2) 0.051(2) 0.0342(15) -0.0025(13) 0.0098(12) 0.0029(14) 
C2 0.0385(14) 0.0364(14) 0.0251(12) 0.0006(11) -0.0005(11) 0.0065(12) 
C4 0.083(2) 0.034(2) 0.045(2) -0.0100(14) -0.005(2) 0.007(2) 
C3 0.055(2) 0.045(2) 0.035(2) -0.0045(13) 0.0017(13) 0.0128(15) 
C5 0.069(2) 0.042(2) 0.044(2) -0.0047(14) -0.008(2) -0.016(2) 
C6 0.043(2) 0.042(2) 0.0280(13) 0.0013(12) -0.0046(11) -0.0095(13) 
C7 0.042(2) 0.073(2) 0.043(2) -0.007(2) -0.0024(14) -0.019(2) 
C8 0.059(2) 0.056(2) 0.040(2) 0.0035(15) 0.0090(15) -0.024(2) 
C9 0.072(2) 0.034(2) 0.0315(15) 0.0090(13) -0.0036(15) -0.0108(15) 
C10 0.053(2) 0.054(2) 0.035(2) -0.0027(14) -0.0041(14) 0.024(2) 
C11 0.032(2) 0.080(2) 0.044(2) -0.012(2) -0.0034(13) 0.007(2) 
C12 0.0375(14) 0.0324(13) 0.0270(13) 0.0002(11) 0.0048(11) -0.0048(11) 
C13 0.049(2) 0.043(2) 0.038(2) -0.0004(13) 0.0086(13) 0.0038(14) 
C14 0.066(2) 0.052(2) 0.049(2) -0.011(2) 0.022(2) -0.003(2) 
C15 0.070(2) 0.064(2) 0.035(2) -0.015(2) 0.008(2) -0.031(2) 
C16 0.047(2) 0.073(2) 0.040(2) 0.003(2) -0.0088(14) -0.022(2) 
C17 0.037(2) 0.048(2) 0.039(2) 0.0015(13) 0.0014(12) -0.0055(13) 
C18 0.046(2) 0.0330(15) 0.040(2) 0.0008(13) -0.0116(13) 0.0000(12) 
C19 0.0410(15) 0.0336(14) 0.0300(13) 0.0000(12) -0.0023(11) -0.0068(12) 
 
_geom_special_details 
; 
 All esds (except the esd in the dihedral angle between two l.s. planes) 
 are estimated using the full covariance matrix.  The cell esds are taken 
 into account individually in the estimation of esds in distances, angles 
 and torsion angles; correlations between esds in cell parameters are only 
 used when they are defined by crystal symmetry.  An approximate (isotropic) 
 treatment of cell esds is used for estimating esds involving l.s. planes. 
; 
 
loop_ 
 _geom_bond_atom_site_label_1 
 _geom_bond_atom_site_label_2 
 _geom_bond_distance 
 _geom_bond_site_symmetry_2 
 _geom_bond_publ_flag 
Ni1 N3 2.026(2) . Y 
Ni1 N2 2.067(2) . Y 
Ni1 N1 2.108(2) . Y 
Ni1 P1 2.3669(7) . Y 
Ni1 S1 2.4566(8) . Y 
Ni1 S2 2.4784(8) . Y 
S1 C1 1.810(3) . Y 
S1 C11 1.822(3) . Y 
S2 C7 1.797(3) . Y 
S2 C8 1.819(3) . Y 
S3 C18 1.627(3) . Y 
S4 C19 1.626(3) . Y 
P1 C12 1.825(2) . ? 
P1 C10 1.829(3) . Y 
P1 C9 1.830(3) . Y 
N1 C6 1.349(3) . ? 
N1 C2 1.349(3) . ? 
N2 C18 1.156(3) . Y 
N3 C19 1.161(3) . Y 
C1 C2 1.504(4) . ? 
C1 H1A 0.94(3) . ? 
C1 H1B 0.93(3) . ? 
C2 C3 1.383(4) . ? 
C4 C5 1.375(5) . ? 
C4 C3 1.375(4) . ? 
C4 H4 0.94(3) . ? 
C3 H3 0.94(3) . ? 
C5 C6 1.386(4) . ? 
C5 H5 0.87(3) . ? 
C6 C7 1.502(4) . ? 
C7 H7A 0.95(3) . ? 
C7 H7B 0.93(3) . ? 
C8 C9 1.510(5) . ? 
C8 H8A 0.99(3) . ? 
C8 H8B 0.93(3) . ? 
C9 H9A 0.98(3) . ? 
C9 H9B 0.88(3) . ? 
C10 C11 1.520(5) . ? 
C10 H10A 0.94(3) . ? 
C10 H10B 0.97(3) . ? 
C11 H11A 0.95(3) . ? 
C11 H11B 1.00(3) . ? 
C12 C17 1.389(4) . ? 
C12 C13 1.394(4) . ? 
C13 C14 1.384(4) . ? 
C13 H13 0.94(3) . ? 
C14 C15 1.376(5) . ? 
C14 H14 0.92(3) . ? 
C15 C16 1.362(5) . ? 
C15 H15 0.90(3) . ? 
C16 C17 1.390(4) . ? 
C16 H16 0.87(3) . ? 
C17 H17 0.89(3) . ? 
 
loop_ 
 _geom_angle_atom_site_label_1 
 _geom_angle_atom_site_label_2 
 _geom_angle_atom_site_label_3 
 _geom_angle 
 _geom_angle_site_symmetry_1 
 _geom_angle_site_symmetry_3 
 _geom_angle_publ_flag 
N3 Ni1 N2 88.84(9) . . Y 
N3 Ni1 N1 169.60(8) . . Y 
N2 Ni1 N1 84.16(8) . . Y 
N3 Ni1 P1 97.52(7) . . Y 
N2 Ni1 P1 169.67(7) . . Y 
N1 Ni1 P1 90.54(6) . . Y 
N3 Ni1 S1 103.46(7) . . Y 
N2 Ni1 S1 87.35(7) . . Y 
N1 Ni1 S1 83.93(6) . . Y 
P1 Ni1 S1 83.27(3) . . Y 
N3 Ni1 S2 91.86(7) . . Y 
N2 Ni1 S2 103.79(7) . . Y 
N1 Ni1 S2 82.39(6) . . Y 
P1 Ni1 S2 84.21(3) . . Y 
S1 Ni1 S2 161.33(3) . . Y 
C1 S1 C11 102.0(2) . . Y 
C1 S1 Ni1 94.47(9) . . ? 
C11 S1 Ni1 105.21(10) . . ? 
C7 S2 C8 100.9(2) . . Y 
C7 S2 Ni1 96.25(10) . . ? 
C8 S2 Ni1 103.32(10) . . ? 
C12 P1 C10 107.90(13) . . ? 
C12 P1 C9 104.81(13) . . ? 
C10 P1 C9 108.8(2) . . Y 
C12 P1 Ni1 124.91(9) . . ? 
C10 P1 Ni1 105.33(10) . . ? 
C9 P1 Ni1 104.36(10) . . ? 
C6 N1 C2 118.9(2) . . ? 
C6 N1 Ni1 121.6(2) . . ? 
C2 N1 Ni1 119.5(2) . . ? 
C18 N2 Ni1 149.5(2) . . Y 
C19 N3 Ni1 151.1(2) . . Y 
C2 C1 S1 116.8(2) . . ? 
C2 C1 H1A 109.5(17) . . ? 
S1 C1 H1A 106.2(17) . . ? 
C2 C1 H1B 110.8(17) . . ? 
S1 C1 H1B 106.4(17) . . ? 
H1A C1 H1B 106.6(23) . . ? 
N1 C2 C3 121.7(2) . . ? 
N1 C2 C1 118.9(2) . . ? 
C3 C2 C1 119.3(2) . . ? 
C5 C4 C3 119.2(3) . . ? 
C5 C4 H4 121.0(19) . . ? 
C3 C4 H4 119.8(19) . . ? 
C4 C3 C2 119.2(3) . . ? 
C4 C3 H3 119.4(18) . . ? 
C2 C3 H3 121.4(18) . . ? 
C4 C5 C6 119.5(3) . . ? 
C4 C5 H5 125.6(21) . . ? 
C6 C5 H5 114.9(22) . . ? 
N1 C6 C5 121.3(3) . . ? 
N1 C6 C7 118.7(2) . . ? 
C5 C6 C7 119.8(3) . . ? 
C6 C7 S2 116.8(2) . . ? 
C6 C7 H7A 113.2(19) . . ? 
S2 C7 H7A 108.6(19) . . ? 
C6 C7 H7B 107.5(19) . . ? 
S2 C7 H7B 103.6(20) . . ? 
H7A C7 H7B 106.2(26) . . ? 
C9 C8 S2 115.0(2) . . ? 
C9 C8 H8A 113.2(18) . . ? 
S2 C8 H8A 100.9(17) . . ? 
C9 C8 H8B 111.9(19) . . ? 
S2 C8 H8B 106.4(19) . . ? 
H8A C8 H8B 108.7(25) . . ? 
C8 C9 P1 108.8(2) . . y 
C8 C9 H9A 113.9(17) . . ? 
P1 C9 H9A 105.9(17) . . ? 
C8 C9 H9B 113.7(19) . . ? 
P1 C9 H9B 109.5(19) . . ? 
H9A C9 H9B 104.7(24) . . ? 
C11 C10 P1 108.7(2) . . y 
C11 C10 H10A 109.3(18) . . ? 
P1 C10 H10A 113.7(18) . . ? 
C11 C10 H10B 111.1(18) . . ? 
P1 C10 H10B 106.2(17) . . ? 
H10A C10 H10B 107.8(25) . . ? 
C10 C11 S1 114.6(2) . . ? 
C10 C11 H11A 112.5(19) . . ? 
S1 C11 H11A 107.6(18) . . ? 
C10 C11 H11B 112.1(18) . . ? 
S1 C11 H11B 102.3(17) . . ? 
H11A C11 H11B 107.0(25) . . ? 
C17 C12 C13 118.6(2) . . ? 
C17 C12 P1 123.1(2) . . ? 
C13 C12 P1 118.3(2) . . ? 
C14 C13 C12 120.3(3) . . ? 
C14 C13 H13 119.3(17) . . ? 
C12 C13 H13 120.4(17) . . ? 
C15 C14 C13 120.4(3) . . ? 
C15 C14 H14 120.8(20) . . ? 
C13 C14 H14 118.8(20) . . ? 
C16 C15 C14 119.8(3) . . ? 
C16 C15 H15 116.5(21) . . ? 
C14 C15 H15 123.7(21) . . ? 
C15 C16 C17 120.8(3) . . ? 
C15 C16 H16 123.0(22) . . ? 
C17 C16 H16 116.1(22) . . ? 
C12 C17 C16 120.0(3) . . ? 
C12 C17 H17 118.4(18) . . ? 
C16 C17 H17 121.6(18) . . ? 
N2 C18 S3 179.1(3) . . ? 
N3 C19 S4 179.4(2) . . ? 
 
 
_refine_diff_density_max    0.279 
_refine_diff_density_min   -0.216 
_refine_diff_density_rms    0.052 


data_compound_5_for_IC9714753
 
_audit_creation_method            TEXSAN 
_chemical_name_systematic 
; 
 ? 
; 
_chemical_name_common             ? 
_chemical_formula_moiety          'C27 H30 N3 Ni P S2, 2(Cl O4)' 
_chemical_formula_structural      'C27 H30 N3 Ni P S2, (Cl O4)2' 
_chemical_formula_analytical      ? 
_chemical_formula_sum             'C27 H30 Cl2 N3 Ni O8 P S2' 
_chemical_formula_weight          749.25 
_chemical_melting_point           'not measured' 
_chemical_compound_source         'synthesis' 
 
loop_ 
 _atom_type_symbol 
 _atom_type_description 
 _atom_type_scat_dispersion_real 
 _atom_type_scat_dispersion_imag 
 _atom_type_scat_source 
 'C'  'C'   0.0033   0.0016 
 'International Tables Vol C Tables 4.2.6.8 and 6.1.1.4' 
 'H'  'H'   0.0000   0.0000 
 'International Tables Vol C Tables 4.2.6.8 and 6.1.1.4' 
 'N'  'N'   0.0061   0.0033 
 'International Tables Vol C Tables 4.2.6.8 and 6.1.1.4' 
 'Ni'  'Ni'   0.3393   1.1124 
 'International Tables Vol C Tables 4.2.6.8 and 6.1.1.4' 
 'P'  'P'   0.1023   0.0942 
 'International Tables Vol C Tables 4.2.6.8 and 6.1.1.4' 
 'S'  'S'   0.1246   0.1234 
 'International Tables Vol C Tables 4.2.6.8 and 6.1.1.4' 
 
_symmetry_cell_setting            monoclinic 
_symmetry_space_group_name_H-M    'P 1 21/c 1' 
 
loop_ 
 _symmetry_equiv_pos_as_xyz 
 'x, y, z' 
 '-x, y+1/2, -z+1/2' 
 '-x, -y, -z' 
 'x-1/2, -y+1/2, z+1/2' 
 
_cell_length_a                    13.063(2) 
_cell_length_b                    16.615(3) 
_cell_length_c                    14.973(3) 
_cell_angle_alpha                 90.00 
_cell_angle_beta                  91.76(2) 
_cell_angle_gamma                 90.00 
_cell_volume                      3248(1) 
_cell_formula_units_Z             4 
_cell_measurement_temperature     293(2) 
_cell_measurement_reflns_used     25 
_cell_measurement_theta_min       13.6 
_cell_measurement_theta_max       17.0 
 
_exptl_crystal_description        plate 
_exptl_crystal_colour             violet 
_exptl_crystal_size_max           0.34
_exptl_crystal_size_mid           0.32 
_exptl_crystal_size_min           0.06 
_exptl_crystal_density_meas       'not measured' 
_exptl_crystal_density_diffrn     1.532 
_exptl_crystal_density_method     ? 
_exptl_crystal_F_000              1544
_exptl_absorpt_coefficient_mu     0.99 
_exptl_absorpt_correction_type    'empirical via \y scans' 
_exptl_absorpt_correction_T_min   0.80 
_exptl_absorpt_correction_T_max   1.00 
 
_exptl_special_details 
; 
 ? 
; 
 
_diffrn_ambient_temperature       293(2) 
_diffrn_radiation_wavelength      0.71069 
_diffrn_radiation_type            MoK\a 
_diffrn_radiation_source          'fine-focus sealed tube' 
_diffrn_radiation_monochromator   graphite 
_diffrn_measurement_device        'Rigaku AFC5S'
_diffrn_measurement_method        '\w--2\q' 
_diffrn_standards_number          3 
_diffrn_standards_interval_count  150 
_diffrn_standards_interval_time   ? 
_diffrn_standards_decay_%         0 
_diffrn_reflns_number             6208 
_diffrn_reflns_av_R_equivalents   0.050 
_diffrn_reflns_av_sigmaI/netI     ?
_diffrn_reflns_limit_h_min        0 
_diffrn_reflns_limit_h_max        16 
_diffrn_reflns_limit_k_min        0 
_diffrn_reflns_limit_k_max        20 
_diffrn_reflns_limit_l_min        -18 
_diffrn_reflns_limit_l_max        18 
_diffrn_reflns_theta_min          2.06 
_diffrn_reflns_theta_max          25.00 
_reflns_number_total              5934 
_reflns_number_observed           3020 
_reflns_observed_criterion        >3sigma(I)   
_computing_data_collection
;
MSC/AFC Diffractometer Control Software
Molecular Structure Corporation, 1995)
;
_computing_cell_refinement
;
MSC/AFC Diffractometer Control Software
(Molecular Structure Corporation, 1995)
;
_computing_data_reduction
;
TEXSAN PROCESS (Molecular Structure
Corporation, 1989)
;
_computing_structure_solution     'SHELXS-86 (Sheldrick, 1990)' 
_computing_structure_refinement
;
TEXSAN (Molecular Structure Corporation, 1989)
;
_computing_molecular_graphics     'ORTEPII (Johnson, 1976)' 
_computing_publication_material
;
TEXSAN (Molecular Structure Corporation, 1989)
;
_refine_special_details 
; 
Hydrogen atoms were included in calculated positions with a fixed
displacement parameter (1.2 x that of the host atom)
;
 
_refine_ls_structure_factor_coef  Fsqd  
_refine_ls_matrix_type            full 
_refine_ls_weighting_scheme        'calc w=1/[\s^2^(Fo^2^)' 
_atom_sites_solution_primary      direct 
_atom_sites_solution_secondary    difmap 
_atom_sites_solution_hydrogens    geom 
_refine_ls_hydrogen_treatment     noref 
_refine_ls_extinction_method      none 
_refine_ls_extinction_coef        ? 
_refine_ls_number_reflns          3020
_refine_ls_number_parameters      397
_refine_ls_number_restraints      0 
_refine_ls_R_factor_obs           0.046 
_refine_ls_wR_factor_obs          0.049  
_refine_ls_goodness_of_fit_obs    1.48
_refine_ls_shift/esd_max          0.01 
_refine_ls_shift/esd_mean         0.00 
 
loop_ 
 _atom_site_label 
 _atom_site_type_symbol 
 _atom_site_fract_x 
 _atom_site_fract_y 
 _atom_site_fract_z 
 _atom_site_U_iso_or_equiv 
 _atom_site_thermal_displace_type 
 _atom_site_occupancy 
 _atom_site_calc_flag 

 
Ni1 Ni 0.27224(6)  0.07745(5)  0.21504(5)  0.0393(2)   Uij ? ?
Cl1 Cl 0.1592(1)   0.0695(1)   0.7006(1)   0.0584(6)   Uij ? ?
Cl2 Cl 0.6283(2)   0.2480(1)   0.5145(1)   0.0639(6)   Uij ? ?
S1 S  0.3730(1)   0.20438(9)  0.2430(1)   0.0481(5)   Uij ? ?
S2 S  0.2052(1)   -0.05981(10) 0.2367(1)   0.0547(5)   Uij ? ?
P1 P  0.2150(1)   0.10023(9)  0.35964(10) 0.0385(4)   Uij ? ?
O1 O  0.2042(4)   -0.0066(3)  0.7251(4)   0.088(2)    Uij ? ?
O2 O  0.1464(6)   0.0718(4)   0.6081(4)   0.134(3)    Uij ? ?
O3 O  0.0642(4)   0.0764(4)   0.7408(4)   0.114(2)    Uij ? ?
O4 O  0.2230(4)   0.1334(3)   0.7307(4)   0.099(2)    Uij ? ?
O5 O  0.6754(7)   0.1746(5)   0.5148(5)   0.189(4)    Uij ? ?
O6 O  0.6401(6)   0.2874(5)   0.4382(5)   0.175(4)    Uij ? ?
O7 O  0.5276(5)   0.2445(5)   0.5337(6)   0.182(4)    Uij ? ?
O8 O  0.6661(10)  0.2820(7)   0.5857(7)   0.274(7)    Uij ? ?
N1 N  0.4108(4)   0.0249(3)   0.2646(3)   0.043(2)    Uij ? ?
N2 N  0.3175(4)   0.0557(3)   0.0828(3)   0.053(2)    Uij ? ?
N3 N  0.1374(4)   0.1270(3)   0.1583(3)   0.053(2)    Uij ? ?
C1 C  0.4949(5)   0.1567(4)   0.2649(4)   0.056(2)    Uij ? ?
C2 C  0.4915(5)   0.0695(4)   0.2934(4)   0.047(2)    Uij ? ?
C3 C  0.5726(5)   0.0385(5)   0.3428(5)   0.064(2)    Uij ? ?
C4 C  0.5735(6)   -0.0428(6)  0.3615(5)   0.082(3)    Uij ? ?
C5 C  0.4939(6)   -0.0900(4)  0.3296(5)   0.071(3)    Uij ? ?
C6 C  0.4143(5)   -0.0548(4)  0.2822(4)   0.052(2)    Uij ? ?
C7 C  0.3291(6)   -0.1062(4)  0.2430(5)   0.067(2)    Uij ? ?
C8 C  0.1674(5)   -0.0614(3)  0.3528(4)   0.053(2)    Uij ? ?
C9 C  0.2171(5)   0.0020(3)   0.4138(4)   0.047(2)    Uij ? ?
C10 C 0.3094(5)   0.1638(4)   0.4169(4)   0.050(2)    Uij ? ?
C11 C 0.3416(5)   0.2329(4)   0.3565(4)   0.054(2)    Uij ? ?
C12 C 0.0902(4)   0.1454(3)   0.3752(4)   0.041(2)    Uij ? ?
C13 C 0.0093(5)   0.1041(4)   0.4106(4)   0.050(2)    Uij ? ?
C14 C -0.0864(5)  0.1396(4)   0.4129(4)   0.055(2)    Uij ? ?
C15 C -0.1030(5)  0.2161(5)   0.3807(5)   0.064(2)    Uij ? ?
C16 C -0.0224(5)  0.2583(4)   0.3466(5)   0.067(3)    Uij ? ?
C17 C 0.0728(5)   0.2231(4)   0.3427(4)   0.054(2)    Uij ? ?
C18 C 0.3994(5)   0.0857(4)   0.0480(5)   0.063(2)    Uij ? ?
C19 C 0.4233(6)   0.0780(4)   -0.0413(5)  0.067(3)    Uij ? ?
C20 C 0.3621(8)   0.0364(5)   -0.0954(5)  0.085(3)    Uij ? ?
C21 C 0.2753(9)   0.0031(8)   -0.0599(6)  0.155(5)    Uij ? ?
C22 C 0.2565(8)   0.0153(7)   0.0252(6)   0.124(4)    Uij ? ?
C23 C 0.0454(5)   0.0953(4)   0.1720(5)   0.066(2)    Uij ? ?
C24 C -0.0454(6)  0.1306(5)   0.1446(5)   0.086(3)    Uij ? ?
C25 C -0.0430(6)  0.2029(6)   0.1005(6)   0.092(3)    Uij ? ?
C26 C 0.0506(7)   0.2365(5)   0.0854(5)   0.083(3)    Uij ? ?
C27 C 0.1379(5)   0.1979(4)   0.1158(4)   0.062(2)    Uij ? ?
H1  H 0.5327      0.1596      0.2118      0.0675      Uiso ? calc
H2  H 0.5296      0.1861      0.3110      0.0675      Uiso ? calc
H3  H 0.6269      0.0723      0.3637      0.0771      Uiso ? calc
H4  H 0.6284      -0.0659     0.3959      0.0989      Uiso ? calc
H5  H 0.4941      -0.1463     0.3403      0.0860      Uiso ? calc
H6  H 0.3243      -0.1532     0.2786      0.0815      Uiso ? calc
H7  H 0.3469      -0.1208     0.1841      0.0815      Uiso ? calc
H8  H 0.0954      -0.0538     0.3535      0.0635      Uiso ? calc
H9  H 0.1843      -0.1128     0.3767      0.0635      Uiso ? calc
H10 H 0.2861      -0.0129     0.4271      0.0562      Uiso ? calc
H11 H 0.1807      0.0050      0.4676      0.0562      Uiso ? calc
H12 H 0.2807      0.1853      0.4693      0.0598      Uiso ? calc
H13 H 0.3679      0.1324      0.4329      0.0598      Uiso ? calc
H14 H 0.4003      0.2578      0.3835      0.0649      Uiso ? calc
H15 H 0.2869      0.2705      0.3528      0.0649      Uiso ? calc
H16 H 0.0194      0.0512      0.4334      0.0595      Uiso ? calc
H17 H -0.1416     0.1105      0.4372      0.0666      Uiso ? calc
H18 H -0.1692     0.2395      0.3820      0.0766      Uiso ? calc
H19 H -0.0324     0.3118      0.3257      0.0809      Uiso ? calc
H20 H 0.1275      0.2521      0.3174      0.0652      Uiso ? calc
H21 H 0.4457      0.1146      0.0862      0.0757      Uiso ? calc
H22 H 0.4832      0.1026      -0.0632     0.0812      Uiso ? calc
H23 H 0.3771      0.0295      -0.1566     0.1018      Uiso ? calc
H24 H 0.2297      -0.0282     -0.0963     0.1861      Uiso ? calc
H25 H 0.1948      -0.0063     0.0472      0.1497      Uiso ? calc
H26 H 0.0424      0.0453      0.2026      0.0792      Uiso ? calc
H27 H -0.1089     0.1053      0.1560      0.1020      Uiso ? calc
H28 H -0.1044     0.2289      0.0811      0.1094      Uiso ? calc
H29 H 0.0551      0.2860      0.0541      0.0992      Uiso ? calc
H30 H 0.2020      0.2229      0.1062      0.0741      Uiso ? calc
 
loop_ 
 _atom_site_aniso_label 
 _atom_site_aniso_U_11 
 _atom_site_aniso_U_22 
 _atom_site_aniso_U_33 
 _atom_site_aniso_U_12 
 _atom_site_aniso_U_13 
 _atom_site_aniso_U_23 
Ni1 0.0412(5) 0.0410(5) 0.0355(4) -0.0077(4) -0.0026(3) 0.0038(4)
Cl1 0.050(1)  0.060(1)  0.066(1) -0.003(1)  0.0019(9)  -0.018(1)
Cl2 0.058(1)  0.081(1)  0.053(1)  0.012(1)  0.006(1)  0.007(1)
S1  0.046(1)  0.042(1)  0.057(1) -0.0072(8) -0.0038(8) 0.0078(8)
S2  0.069(1)  0.045(1)  0.050(1) -0.018(1)  0.0037(9)  -0.0036(8)
P1  0.042(1)  0.0363(9) 0.0375(9) 0.0008(7) -0.0003(7) 0.0038(7)
O1  0.083(4)  0.062(4)  0.118(5)  0.008(3) -0.009(3) -0.007(3)
O2  0.241(8)  0.106(5)  0.053(4)  0.009(5) -0.015(4) -0.010(4)
O3  0.057(3)  0.119(5)  0.168(6) -0.002(4)  0.039(4) -0.030(5)
O4  0.074(4)  0.069(4)  0.154(5) -0.019(3) -0.007(4) -0.041(4)
O5  0.23(1)   0.150(7)  0.194(8)  0.128(7)  0.107(7)  0.076(6)
O6  0.198(8)  0.202(8)  0.129(6)  0.088(6)  0.092(6)  0.116(6)
O7  0.087(5)  0.207(9)  0.25(1)   0.051(6)  0.046(6)  0.139(8)
O8  0.33(2)   0.29(1)   0.20(1)  -0.07(1)  -0.10(1)  -0.09(1)
N1  0.049(3)  0.040(3)  0.039(3)  0.004(3)  0.006(3)  0.001(2)
N2  0.064(4)  0.058(4)  0.037(3) -0.017(3) -0.002(3)  0.001(3)
N3  0.049(3)  0.067(4)  0.043(3) -0.014(3) -0.012(3)  0.017(3)
C1  0.037(4)  0.065(5)  0.067(5) -0.005(3) -0.004(3) -0.008(4)
C2  0.039(4)  0.062(5)  0.041(4)  0.007(4)  0.004(3) -0.001(3)
C3  0.047(4)  0.084(6)  0.062(5)  0.007(4)  0.000(4)  0.007(4)
C4  0.058(5)  0.111(7)  0.078(6)  0.033(5)  0.016(5)  0.032(5)
C5  0.071(5)  0.065(5)  0.079(5)  0.030(5)  0.031(5)  0.023(4)
C6  0.054(4)  0.056(5)  0.049(4)  0.009(4)  0.016(3) -0.000(3)
C7  0.092(6)  0.040(4)  0.071(5)  0.005(4)  0.031(4) -0.012(4)
C8  0.064(4)  0.040(4)  0.054(4) -0.001(3)  0.011(3)  0.008(3)
C9  0.052(4)  0.041(4)  0.047(4)  0.007(3)  0.007(3)  0.009(3)
C10 0.053(4)  0.051(4)  0.046(4)  0.005(3) -0.007(3) -0.005(3)
C11 0.047(4)  0.045(4)  0.070(5)  0.000(3) -0.012(3) -0.017(4)
C12 0.040(4)  0.044(4)  0.041(4)  0.002(3)  0.006(3)  0.003(3)
C13 0.056(4)  0.044(4)  0.049(4) -0.003(3)  0.003(3)  0.009(3)
C14 0.053(5)  0.058(5)  0.056(4) -0.010(4)  0.012(3)  0.005(4)
C15 0.042(4)  0.076(5)  0.074(5)  0.009(4)  0.005(4)  0.003(4)
C16 0.053(5)  0.056(5)  0.093(6)  0.015(4)  0.002(4)  0.029(4)
C17 0.045(4)  0.049(4)  0.069(5)  0.005(3)  0.008(3)  0.014(4)
C18 0.067(5)  0.065(5)  0.057(5)  0.006(4) -0.004(4) -0.005(4)
C19 0.074(5)  0.070(5)  0.059(5)  0.008(4)  0.018(4)  0.003(4)
C20 0.116(8)  0.092(6)  0.047(5) -0.009(6)  0.002(5) -0.000(5)
C21 0.16(1)   0.23(1)   0.065(7) -0.12(1)   0.008(7) -0.047(8)
C22 0.15(1)   0.18(1)   0.049(5) -0.092(8)  0.010(5) -0.028(6)
C23 0.056(5)  0.075(5)  0.068(5) -0.019(4) -0.019(4)  0.023(4)
C24 0.056(5)  0.107(7)  0.093(6) -0.014(5) -0.025(5)  0.026(6)
C25 0.056(5)  0.126(8)  0.092(6)  0.007(5) -0.031(5)  0.035(6)
C26 0.070(6)  0.093(6)  0.085(6) -0.002(5) -0.021(5)  0.035(5)
C27 0.059(5)  0.075(5)  0.052(4) -0.014(4) -0.009(4)  0.028(4)
 

 
loop_ 
 _geom_bond_atom_site_label_1 
 _geom_bond_atom_site_label_2 
 _geom_bond_distance 
 _geom_bond_site_symmetry_2 
 _geom_bond_publ_flag
 
Ni1  S1    2.515(2) . Y
Ni1  S2    2.468(2) . Y
Ni1  P1    2.343(2) . Y
Ni1  N1    2.123(5) . Y
Ni1  N2    2.115(5) . Y
Ni1  N3    2.100(5) . Y
Cl1  O1    1.437(5) . ?
Cl1  O2    1.390(5) . ?
Cl1  O3    1.401(5) . ?
Cl1  O4    1.414(5) . ?
Cl2  O5    1.366(6) . ?
Cl2  O6    1.329(6) . ?
Cl2  O7    1.357(6) . ?
Cl2  O8    1.292(9) . ?
S1  C1     1.799(7) . Y
S1  C11    1.822(7) . Y
S2  C7     1.793(7) . Y
S2  C8     1.821(6) . Y
P1  C9     1.822(6) . Y
P1  C10    1.819(6) . Y
P1  C12    1.816(6) . Y
N1  C2     1.349(7) . Y
N1  C6     1.352(8) . Y
N2  C18    1.303(8) . ?
N2  C22    1.337(9) . ?
N3  C23    1.334(8) . ?
N3  C27    1.339(8) . ?
C1  C2     1.511(9) . Y
C2  C3     1.375(8) . ?
C3  C4     1.38(1)  . ?
C4  C5     1.38(1)  . ?
C5  C6     1.371(9) . ?
C6  C7     1.506(9) . Y
C8  C9     1.526(8) . Y
C10  C11   1.529(9) . Y
C12  C13   1.380(8) . ?
C12  C17   1.396(8) . ?
C13  C14   1.384(8) . ?
C14  C15   1.375(9) . ?
C15  C16   1.377(9) . ?
C16  C17   1.377(8) . ?
C18  C19   1.389(9) . ?
C19  C20   1.32(1)  . ?
C20  C21   1.38(1)  . ?
C21  C22   1.32(1)  . ?
C23  C24   1.374(9) . ?
C24  C25   1.37(1)  . ?
C25  C26   1.37(1)  . ?
C26  C27   1.373(9) . ?

loop_ 
 _geom_angle_atom_site_label_1 
 _geom_angle_atom_site_label_2 
 _geom_angle_atom_site_label_3 
 _geom_angle 
 _geom_angle_site_symmetry_1 
 _geom_angle_site_symmetry_3 
 _geom_angle_publ_flag 

S1  Ni1  S2    159.91(6) . . Y 
S1  Ni1  P1     83.74(6) . . Y 
S1  Ni1  N1      81.4(1) . . Y 
S1  Ni1  N2      98.0(2) . . ? 
S1  Ni1  N3      99.6(2) . . ? 
S2  Ni1  P1     84.43(6) . . Y 
S2  Ni1  N1      82.9(1) . . Y 
S2  Ni1  N2      94.4(2) . . ? 
S2  Ni1  N3      96.8(2) . . ? 
P1  Ni1  N1      92.1(1) . . Y 
P1  Ni1  N2     177.6(2) . . Y 
P1  Ni1  N3      91.3(1) . . ? 
N1  Ni1  N2      89.8(2) . . ? 
N1  Ni1  N3     176.6(2) . . Y 
N2  Ni1  N3      86.8(2) . . Y 
O1  Cl1  O2     108.3(4) . . ? 
O1  Cl1  O3     108.8(4) . . ? 
O1  Cl1  O4     110.3(3) . . ? 
O2  Cl1  O3     110.2(4) . . ? 
O2  Cl1  O4     110.4(4) . . ? 
O3  Cl1  O4     108.8(3) . . ? 
O5  Cl2  O6     112.2(4) . . ? 
O5  Cl2  O7     113.6(5) . . ? 
O5  Cl2  O8     103.2(7) . . ? 
O6  Cl2  O7     110.0(5) . . ? 
O6  Cl2  O8     116.3(7) . . ? 
O7  Cl2  O8     101.0(7) . . ? 
Ni1  S1  C1      96.7(2) . . ? 
Ni1  S1  C11    104.0(2) . . ? 
C1   S1  C11     99.7(3) . . Y 
Ni1  S2  C7      94.6(2) . . ? 
Ni1  S2  C8     104.3(2) . . ? 
C7  S2  C8      102.4(3) . . Y 
Ni1  P1  C9     105.4(2) . . ? 
Ni1  P1  C10    107.3(2) . . ? 
Ni1  P1  C12    119.9(2) . . ? 
C9  P1  C10     108.0(3) . . Y 
C9  P1  C12     108.4(3) . . Y 
C10  P1  C12    107.3(3) . . Y 
Ni1  N1  C2     122.4(4) . . ? 
Ni1  N1  C6     119.7(4) . . ? 
C2  N1  C6      117.1(6) . . ? 
Ni1  N2  C18    124.4(5) . . ? 
Ni1  N2  C22    120.8(5) . . ? 
C18  N2  C22    114.5(6) . . ? 
Ni1  N3  C23    122.1(4) . . ? 
Ni1  N3  C27    121.4(4) . . ? 
C23  N3  C27    115.9(6) . . ? 
S1  C1  C2      116.1(4) . . Y 
N1  C2  C1      117.8(5) . . ? 
N1  C2  C3      123.3(6) . . ? 
C1  C2  C3      118.9(6) . . ? 
C2  C3  C4      118.5(7) . . ? 
C3  C4  C5      119.1(7) . . ? 
C4  C5  C6      119.4(7) . . ? 
N1  C6  C5      122.6(7) . . ? 
N1  C6  C7      117.3(6) . . ? 
C5  C6  C7      120.0(7) . . ? 
S2  C7  C6      115.6(4) . . Y 
S2  C8  C9      116.0(4) . . ? 
P1  C9  C8      110.6(4) . . Y 
P1  C10  C11    110.6(4) . . Y 
S1  C11  C10    115.5(4) . . Y 
P1  C12  C13    122.9(5) . . ? 
P1  C12  C17    118.4(4) . . ? 
C13  C12  C17   118.4(6) . . ? 
C12  C13  C14   120.0(6) . . ? 
C13  C14  C15   121.2(6) . . ? 
C14  C15  C16   119.2(6) . . ? 
C15  C16  C17   120.1(6) . . ? 
C12  C17  C16   121.1(6) . . ? 
N2  C18  C19    124.1(7) . . ? 
C18  C19  C20   119.4(7) . . ? 
C19  C20  C21   117.6(8) . . ? 
C20  C21  C22   119.3(9) . . ? 
N2  C22  C21    125.1(9) . . ? 
N3  C23  C24    124.0(7) . . ? 
C23  C24  C25   119.0(7) . . ? 
C24  C25  C26   118.1(7) . . ? 
C25  C26  C27   119.5(7) . . ? 
N3  C27  C26    123.5(7) . . ? 
 
_refine_diff_density_max    0.47 
_refine_diff_density_min   -0.36  
